# Supplementary material for: Predictive value of tachycardia for mortality in trauma-related haemorrhagic shock: a systematic review and meta-regression
Source: PubMed Central journal article supplement — BMJ Open. 2022 Oct 19;12(10):e059271. doi: 10.1136/bmjopen-2021-059271 (PMC9582324; doi:10.1136/bmjopen-2021-059271), 2022-10-19
Supplement: bmjopen-2021-059271.draft_revisions.pdf [file bmjopen-2021-059271.draft_revisions.pdf]

# BMJ Open

BMJ Open is committed to open peer review. As part of this commitment we make the peer review history of every article we publish publicly available.

When an article is published we post the peer reviewers' comments and the authors' responses online. We also post the versions of the paper that were used during peer review. These are the versions that the peer review comments apply to.

The versions of the paper that follow are the versions that were submitted during the peer review process. They are not the versions of record or the final published versions. They should not be cited or distributed as the published version of this manuscript.

BMJ Open is an open access journal and the full, final, typeset and author-corrected version of record of the manuscript is available on our site with no access controls, subscription charges or pay-per-view fees (<http://bmjopen.bmj.com>).

If you have any questions on BMJ Open's open peer review process please email [info.bmjopen@bmj.com](mailto:info.bmjopen@bmj.com)

# BMJ Open

## Tachycardia does not imply an increased risk of mortality in trauma-related hemorrhagic shock - A Systematic Review and Meta-regression

|                               |                                                                                                                                                                                                                                                                                                                                                                                                                                                                                                                                                                                                                                                                                                                                                                                                                                                                                                                                                                                                                                                                                                                                                                              |
|-------------------------------|------------------------------------------------------------------------------------------------------------------------------------------------------------------------------------------------------------------------------------------------------------------------------------------------------------------------------------------------------------------------------------------------------------------------------------------------------------------------------------------------------------------------------------------------------------------------------------------------------------------------------------------------------------------------------------------------------------------------------------------------------------------------------------------------------------------------------------------------------------------------------------------------------------------------------------------------------------------------------------------------------------------------------------------------------------------------------------------------------------------------------------------------------------------------------|
| Journal:                      | <i>BMJ Open</i>                                                                                                                                                                                                                                                                                                                                                                                                                                                                                                                                                                                                                                                                                                                                                                                                                                                                                                                                                                                                                                                                                                                                                              |
| Manuscript ID                 | bmjopen-2021-059271                                                                                                                                                                                                                                                                                                                                                                                                                                                                                                                                                                                                                                                                                                                                                                                                                                                                                                                                                                                                                                                                                                                                                          |
| Article Type:                 | Original research                                                                                                                                                                                                                                                                                                                                                                                                                                                                                                                                                                                                                                                                                                                                                                                                                                                                                                                                                                                                                                                                                                                                                            |
| Date Submitted by the Author: | 13-Nov-2021                                                                                                                                                                                                                                                                                                                                                                                                                                                                                                                                                                                                                                                                                                                                                                                                                                                                                                                                                                                                                                                                                                                                                                  |
| Complete List of Authors:     | Jávor, Péter; University of Szeged, Department of Traumatology<br>Hanák, Lilla; Pécsi Tudományegyetem Általános Orvostudományi Kar<br>Hegyi, Péter; Pécsi Tudományegyetem Általános Orvostudományi Kar, Institute for Translational Medicine<br>Csonka, Endre; Szegedi Tudományegyetem Általános Orvostudományi Kar, Department of Traumatology<br>Butt, Edina; Szegedi Tudományegyetem Általános Orvostudományi Kar, Department of Traumatology<br>Horváth, Tamara; Szegedi Tudományegyetem Általános Orvostudományi Kar<br>Góg, István; Military Hospital, Department of Vascular Surgery<br>Lukacs, Andrea; Szegedi Tudományegyetem Általános Orvostudományi Kar, Department of Public Health<br>Soós, Alexandra; Pécsi Tudományegyetem Általános Orvostudományi Kar<br>Rumbus, Zoltán; Pécsi Tudományegyetem Általános Orvostudományi Kar, Department of Thermophysiology<br>Pákai, Eszter; Pécsi Tudományegyetem Általános Orvostudományi Kar, Department of Thermophysiology<br>Toldi, János; Pécsi Tudományegyetem Általános Orvostudományi Kar, Department of Anesthesiology and Intensive Care<br>Hartmann, Petra; University of Szeged, Department of Traumatology |
| Keywords:                     | Trauma management < ORTHOPAEDIC & TRAUMA SURGERY, Bleeding disorders & coagulopathies < HAEMATOLOGY, ORTHOPAEDIC & TRAUMA SURGERY, ACCIDENT & EMERGENCY MEDICINE                                                                                                                                                                                                                                                                                                                                                                                                                                                                                                                                                                                                                                                                                                                                                                                                                                                                                                                                                                                                             |

SCHOLARONE™  
Manuscripts

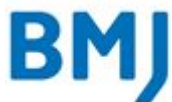

I, the Submitting Author has the right to grant and does grant on behalf of all authors of the Work (as defined in the below author licence), an exclusive licence and/or a non-exclusive licence for contributions from authors who are: i) UK Crown employees; ii) where BMJ has agreed a CC-BY licence shall apply, and/or iii) in accordance with the terms applicable for US Federal Government officers or employees acting as part of their official duties; on a worldwide, perpetual, irrevocable, royalty-free basis to BMJ Publishing Group Ltd ("BMJ") its licensees and where the relevant Journal is co-owned by BMJ to the co-owners of the Journal, to publish the Work in this journal and any other BMJ products and to exploit all rights, as set out in our [licence](#).

The Submitting Author accepts and understands that any supply made under these terms is made by BMJ to the Submitting Author unless you are acting as an employee on behalf of your employer or a postgraduate student of an affiliated institution which is paying any applicable article publishing charge ("APC") for Open Access articles. Where the Submitting Author wishes to make the Work available on an Open Access basis (and intends to pay the relevant APC), the terms of reuse of such Open Access shall be governed by a Creative Commons licence – details of these licences and which [Creative Commons](#) licence will apply to this Work are set out in our licence referred to above.

Other than as permitted in any relevant BMJ Author's Self Archiving Policies, I confirm this Work has not been accepted for publication elsewhere, is not being considered for publication elsewhere and does not duplicate material already published. I confirm all authors consent to publication of this Work and authorise the granting of this licence.

1  
2  
3 1 **TACHYCARDIA DOES NOT IMPLY AN INCREASED RISK OF MORTALITY IN**  
4 **TRAUMA-RELATED HEMORRHAGIC SHOCK - A SYSTEMATIC REVIEW AND**  
5 **2 META-REGRESSION**  
6  
7  
8  
9

10 4 **Péter Jávor<sup>1</sup>, Lilla Hanák<sup>2</sup>, Péter Hegyi<sup>2;3</sup>, Endre Csonka<sup>1</sup>, Edina Butt<sup>1</sup>, Tamara Horváth<sup>4</sup>, István**  
11 **Góg<sup>5</sup>, Anita Lukács<sup>6</sup>, Alexandra Soós<sup>2</sup>, Zoltán Rumbus<sup>7</sup>, Eszter Pákai<sup>7</sup>, János Toldi<sup>8</sup>, Petra**  
12 **6 Hartmann<sup>1\*</sup>**  
13  
14

15 7 <sup>1</sup> Department of Traumatology, University of Szeged, Szeged, Hungary

16 8 <sup>2</sup> Institute for Translational Medicine, Medical School, University of Pécs, Pécs, Hungary

17 9 <sup>3</sup> Center for Translational Medicine, Department of Medicine, University of Szeged, Szeged, Hungary

18 10 <sup>4</sup> Institute of Surgical Research, University of Szeged, Szeged, Hungary

19 11 <sup>5</sup> Department of Vascular Surgery, Hungarian Defense Forces Medical Center - Military Hospital,  
20 Budapest, Hungary

21 12 <sup>6</sup> Department of Public Health, Faculty of Medicine, University of Szeged, Szeged, Hungary

22 13 <sup>7</sup> Department of Thermophysiology, Medical School, University of Pécs, Pécs, Hungary

23 14 <sup>8</sup> Department of Anesthesiology and Intensive Care, Medical School, University of Pécs, Pécs,  
24 Hungary

25 17 **\*Correspondence**

26 18 Petra Hartmann M.D., Ph.D.

27 19 Semmelweis utca 6., Szeged, 6725 – Hungary

28 20 Tel: +(36-62) 545-531; Fax: +(36-62) 545-530

29 21 E-mail: hartmann.petra@med.u-szeged.hu

30 22  
31 23 **Word count** (excluding title page, abstract, references, figures, and tables): 2868

32 24 **Number of Tables:** 2

33 25 **Number of Figures:** 4  
34  
35  
36  
37  
38  
39  
40  
41  
42  
43  
44  
45  
46  
47  
48  
49  
50  
51  
52  
53  
54  
55  
56  
57  
58  
59  
60

## 26 ABSTRACT

27 **Introduction:** Heart rate (HR) is one of the physiologic variables in the early assessment of trauma-  
28 related hemorrhagic shock, according to Advanced Trauma Life Support (ATLS). Regarding its  
29 efficiency as a predictor of mortality, there is contradictory data in literature. Furthermore, the linear  
30 association between HR and the severity of shock and blood loss presented by ATLS is doubtful. This  
31 systematic review updates current knowledge on the role of HR in the initial hemodynamic assessment  
32 of trauma patients.

33 **Methods:** A systematic search of EMBASE, MEDLINE, CENTRAL and Web of Science databases  
34 was performed to identify papers providing early HR and mortality data on bleeding trauma patients  
35 from the past decade. The association between HR and mortality of trauma patients was assessed using  
36 meta-regression analysis. As a subgroup analysis, meta-regression was performed on patients who  
37 received blood products.

38 **Results:** From a total of 2017 papers, 19 studies met our eligibility criteria. Our primary meta-regression  
39 did not find a significant relation ( $p=0.847$ ) between HR and mortality in trauma patients with  
40 hemorrhage. Our subgroup analysis included 10 studies, and it could not reveal a linear association  
41 between HR and mortality rate.

42 **Conclusions:** Tachycardia should raise suspicion for bleeding, but it might not be appropriate to guide  
43 therapeutic decisions such as transfusion of blood products. In addition to the literature demonstrating  
44 the multi-phasic response of HR to bleeding, our study presents the lack of linear association with  
45 mortality. Considering these, modifying the pattern of HR derangements in the ATLS shock  
46 classification may result in a more precise teaching tool for young clinicians.

47 **Keywords:** "tachycardia"; "heart rate"; "hemorrhagic shock"; "multiple trauma"; "ATLS"

## 48 STRENGTHS AND LIMITATIONS OF THIS STUDY

- 49 • The study summarizes and analyzes scientific data from the past 10 years to investigate trauma-  
50 related hemorrhage, an issue with high clinical importance.
- 51 • The paper provides a systematic search of EMBASE, MEDLINE (via PubMed), Cochrane  
52 Controlled Register of Trials (CENTRAL) and Web of Science databases, utilizes rigorous  
53 study selection criteria, assesses each enrolled paper for bias, and performs meta-regression  
54 analyses.
- 55 • Studies focusing on special populations including pregnant, pediatric (<18 years of age),  
56 geriatric ( $\geq 55$  years), burned and traumatic spinal- or brain injured patients were excluded from  
57 the study.
- 58 • The heterogeneity and the difference in patient number among the included studies prevented  
59 us from performing an adequate meta-analysis.

## 60 INTRODUCTION

61 Hypovolemia caused by hemorrhage is the most common cause of shock in trauma. Delay in the  
62 recognition of shock has been linked to unfavorable outcomes such as organ dysfunction and  
63 mortality.[1,2] The initial assessment of trauma-related hypovolemic shock is based on derangements  
64 of physiologic variables (including base deficit) according to the recommendations of Advanced Trauma  
65 Life Support (ATLS).[3] Among these variables, heart rate (HR) is one of the most controversial when  
66 it comes to blood loss.[4-7] As commonly criticized, HR is not only influenced by hemodynamic  
67 changes, but also by several other factors such as anxiety, pain, and medications resulting in a low  
68 specificity for hemorrhage.[4,8,9] Furthermore, ATLS suggests the continuously increasing tendency of  
69 HR in accordance with the severity of bleeding.[3] However, in clinical reality, the HR response to  
70 hemorrhage is rather biphasic or triphasic than linear.[8,10,11] Consequently, the utility of HR in the  
71 early management of bleeding trauma patients was called into doubt during the past decades.[4,5,8,9]  
72 The reliability of HR was already questioned in the early 2000s by a retrospective analysis on 14325  
73 trauma patients. According to the results of this study, HR displayed insufficient sensitivity and  
74 specificity in predicting hypotension after trauma.[9] A few years later, a registry analysis denoted  
75 further doubts in HR, as it had performed poorly in predicting the need for an emergent intervention and  
76 administration of packed red blood cells (pRBC) in the first 24 hours post-injury.[4] Additionally, as  
77 ATLS was progressively widespread, the role of HR in the classification of hypovolemic shock sparked  
78 controversy. In 2013, 16305 patients from the German Trauma Register (DGU®) were allocated into shock  
79 classes according to ATLS guidance.[12] Ultimately, no significant alterations in mean HR were found  
80 within the four classes. According to these data, expecting tachycardia in case of hypovolemia can be  
81 misleading in many instances. Moreover, a false sense of hemodynamic stability based on normal HR  
82 can lead to fatal consequences, since the lack of tachycardia in hypoperfusion is associated with poor  
83 prognosis.[13]

84 Despite criticism, increased HR has been known as a characteristic of hypovolemic shock for a very  
85 long time. The utility of HR as a predictor of mortality is supported by several papers.[14,15] An  
86 international, cross-sectional study using data from two large trauma cohorts was conducted to develop  
87 and validate a prognostic model to predict death due to bleeding. Although HR showed a significant  
88 relation to mortality, the curve was U-shaped as opposed to the linear model presented by ATLS.[15]

89 A notable limitation of previous studies is that trauma protocols have undergone several changes, which  
90 makes recent information incomparable with data from the past. In 2010, the CRASH-2 trial brought  
91 one of the most prominent findings of the past decades with the validation of the safety and effectivity  
92 of tranexamic acid (TXA).[16-18]

93 The present systematic review investigates the role of HR in the initial assessment of trauma patients  
94 with hemorrhage. Regarding the efficiency of HR as a predictor of outcome in trauma, there is  
95 contradictory data in the literature.[4,5,15] Furthermore, the linear association between HR and blood

1  
2  
3 96 loss presented by ATLS is questionable.[8,15] Due to the development of trauma care and a paradigm  
4 97 shift in the initial fluid resuscitation approach in the past decades,[16,19] we aimed to update current  
5 98 knowledge on the effectivity of HR as predictor of mortality post-injury. For this purpose, a  
6 99 comprehensive database search has been conducted, data has been extracted and analyzed through meta-  
7  
8  
9 100 regressions. As a primary outcome, the relationship between HR and mortality has been assessed. Since  
10 101 the severity of bleeding has a close relation to the risk for adverse outcomes including increased organ  
11 102 dysfunction and mortality, our study may be able to initiate further research reappraising the validity of  
12  
13 103 HR in the ATLS classification of hypovolemic shock.  
14  
15  
16

## 17 18 104 **MATERIALS AND METHODS**

### 19 20 105 **Protocol and search strategy**

21 106 The present review is reported in accordance with Preferred Reporting Items for Systematic Reviews  
22 107 and Meta-Analyses (PRISMA).[20] The PRISMA checklist for our work is available in the supporting  
23 108 information (Table S1). The review protocol was registered in the Open Science Framework (OSF)  
24 109 system under registration DOI: 10.17605/OSF.IO/HJWYR.

25 110 A systematic search of EMBASE, MEDLINE (via PubMed), Cochrane Controlled Register of Trials  
26 111 (CENTRAL) and Web of Science databases was performed with the following search terms: "trauma"  
27 112 AND ("heart rate" OR "pulse rate" OR "tachycardia" OR "bradycardia" OR "vital sign" OR "vital signs"  
28 113 OR "vital parameter" OR "vital parameters") AND "mortality" AND ("bleeding" OR "haemorrhage"  
29 114 OR "hemorrhage" OR "haemodynamic" OR "hemodynamic").  
30  
31  
32  
33  
34  
35

### 36 115 **Eligibility criteria**

37 116 Records on bleeding trauma patients were considered for eligibility only if they provided initial HR  
38 117 values (prehospital (PH) or upon admission (AD)) in addition to mortality data covering a time interval  
39 118 not exceeding 30 days from the time of injury. If the inclusion criteria of the individual studies included  
40 119 transfusion of blood products and/or positive focused assessment with sonography for trauma (FAST)  
41 120 examination and/or hemodinamical instability after trauma and/or abdominal gunshot injury, the patient  
42 121 cohort was considered hemorrhagic.

43 122 Non-English language reports, records on special populations such as pregnant, pediatric (<18 years of  
44 123 age) or geriatric ( $\geq 55$  years) were not considered. Studies on patients suffering burns, traumatic spinal  
45 124 or- brain injuries were excluded.

46 125 Taking the development of trauma care in the past decade into consideration (e.g.: introduction of  
47 126 TXA,[16] and paradigm shift in fluid resuscitation [19]) all studies that included data on patients who  
48 127 received treatment before 2010 were also excluded.

### 49 128 **Study selection**

50  
51  
52  
53  
54  
55  
56  
57  
58  
59  
60

1  
2  
3 129 After having duplicates removed with the help of a reference manager software (EndNote X7), articles  
4 130 published before 2010 were also discarded. On the remaining studies, title and abstract screenings were  
5 131 performed by two review authors (PJ, IG). Thereafter, the full texts of the potentially eligible records  
6 132 were obtained and assessed based on the criteria described above. Disagreements were resolved by  
7 133 consensus.

#### 11 134 **Data extraction**

13 135 The following information was extracted from the eligible studies: title, first author's name, year of  
14 136 publication, study design, data origin (country, hospital database/registry), data collection period,  
15 137 inclusion criteria, subgroups, patient number of the subgroups, total patient number, HR (mean  $\pm$   
16 138 standard deviation (SD) or median [interquartile range] (IQR)), phase of recording HR values (PH/AD),  
17 139 mortality within 30 days (n, %). In case of studies using overlapping data, the less comprehensive report  
18 140 with the smaller sample size was excluded.

#### 23 141 **Risk of bias assessment**

24 142 Quality In Prognostic Studies (QUIPS) tool was used separately by two authors (TH and ZR) to assess  
25 143 the risk of bias for each study.[21] Disagreements were resolved by consensus. QUIPS consists of six  
26 144 main domains: 'Study attrition', 'Study participation', 'Prognostic factor', 'Outcome measurement',  
27 145 'Study confounding' and 'Statistical analysis and reporting'. A rating for each domain was assigned as  
28 146 carrying 'low', 'moderate' or 'high' risk of bias. Based on the ratings of the individual domains, the  
29 147 overall risk of bias was evaluated by each study.

#### 35 148 **Statistical analysis**

36 149 The association between HR and mortality of trauma patients was assessed using meta-regression  
37 150 analysis. A result of  $p < 0.05$  was considered as significant. As a subgroup analysis, meta-regression was  
38 151 performed on trauma patients who received blood products. Statistical analyses were performed with  
39 152 Stata 16 (Stata Corp, College Station, TX, USA). To convert median values to means, we used the  
40 153 method of Xiang Wan.[22]

## 46 154 **RESULTS**

### 49 155 **Results of systematic search and selection**

50 156 Two thousand and seventeen records were identified through our search strategy on 1 September 2020.  
51 157 One thousand three hundred seventy-three articles were screened on title. Five hundred fifty-seven  
52 158 abstracts were assessed, and 132 publications were enrolled into the final, comprehensive full text  
53 159 analysis. Ultimately, 19 records met our eligibility criteria. The flowchart of study enrollment is shown  
54 160 in Figure 1.

58 161 **Fig. 1.** Study flowchart



## 162 Study characteristics

163 All publications processed data of trauma patients with suspected hemorrhage from the past 10 years.  
 164 From 19 studies yielding 3057 patients in total, 13 records collected data retrospectively and 6  
 165 prospectively. The number of participants in each dataset ranged from 15 to 428. Ten studies enrolled  
 166 patients only if they received blood products as a part of the initial management. Seven publications  
 167 used hemodynamic instability identified mainly by vital parameters as inclusion criteria. One study  
 168 analyzed patients with a positive result on FAST examination after blunt abdominal trauma. One  
 169 research enrolled patients with abdominal gunshot injuries. Each of the inclusion criteria listed above  
 170 entails a strong suspicion for significant bleeding. The main characteristics of the 19 eligible studies are  
 171 summarized in Table 1. The more comprehensive description of the papers is available in the  
 172 supplementary material (Table S2).

| First author, year     | Country        | Data collection | Patient characteristics                   | Patient number | HR mean $\pm$ SD (PH/AD) | Mortality n, (%) |
|------------------------|----------------|-----------------|-------------------------------------------|----------------|--------------------------|------------------|
| Bohonek 2019 [27]      | Czech Republic | retrospective   | received blood products                   | 46             | 94.8 $\pm$ 59.0 (AD)     | 10 (21.7)        |
| Boudreau 2019 [28]     | USA            | retrospective   | received blood products                   | 116            | 101.3 $\pm$ 43.0 (PH)    | 27 (23.3)        |
| Duchesne 2019 [29]     | USA            | retrospective   | hemodynamic instability                   | 279            | 120.6 $\pm$ 27.7 (AD)    | 89 (32.0)        |
| Montazer 2019 [30]     | Iran           | prospective     | hemodynamic instability                   | 400            | 110.0 $\pm$ 14.0 (AD)    | 67 (16.7)        |
| Priestley 2019 [31]    | USA            | retrospective   | received blood products                   | 283            | 104.0 $\pm$ 24.0 (PH)    | 88 (31.1)        |
| Barmparas 2018 [32]    | USA            | retrospective   | received blood products                   | 120            | 101.1 $\pm$ 39.7 (AD)    | 59 (49.2)        |
| Chaochan kit 2018 [33] | Thailand       | retrospective   | received blood products                   | 15             | 113.0 $\pm$ 22.1 (AD)    | 12 (80.0)        |
| Moore 2018 [34]        | USA            | prospective     | hemodynamic instability                   | 125            | 110.0 $\pm$ 15.9 (PH)    | 16 (12.8)        |
| Ng 2018 [35]           | Canada         | retrospective   | hemodynamic instability                   | 117            | 112.0 $\pm$ 35.0 (AD)    | 22 (19.0)        |
| Guo 2017 [36]          | China          | prospective     | hemodynamic instability                   | 428            | 111.3 $\pm$ 17.9 (AD)    | 104 (23.4)       |
| Heidari 2017 [37]      | Iran           | prospective     | blunt abdominal trauma with positive FAST | 168            | 105.3 $\pm$ 23.4 (AD)    | 57 (33.9)        |
| Luehr 2017 [38]        | USA            | retrospective   | received blood products                   | 115            | 133.3 $\pm$ 21.4 (PH)    | 20 (17.4)        |
| Naumann 2017 [39]      | UK             | retrospective   | received blood products                   | 17             | 108.0 $\pm$ 16.2 (AD)    | 3 (17.6)         |
| Savage 2017 [40]       | USA            | retrospective   | received blood products                   | 330            | 108.2 $\pm$ 55.3 (AD)    | 82 (24.8)        |
| Day 2016 [41]          | USA            | retrospective   | received blood products                   | 116            | 98.0 $\pm$ 24.0 (PH)     | 13 (11.0)        |
| Ordoñez 2016 [42]      | Colombia       | retrospective   | hemodynamic instability                   | 171            | 112.6 $\pm$ 23.5 (AD)    | 26 (15.2)        |
| Shah 2015 [43]         | Pakistan       | retrospective   | isolated abdominal gunshot wound          | 70             | 99.8 $\pm$ 30.3 (AD)     | 11 (15.7)        |

|                    |              |             |                         |    |                   |           |
|--------------------|--------------|-------------|-------------------------|----|-------------------|-----------|
| Thurston 2015 [44] | South Africa | prospective | hemodynamic instability | 50 | 123.3 ± 13.1 (AD) | 11 (22.0) |
| Sisak 2013 [45]    | Australia    | prospective | received blood products | 91 | 100.0 ± 30.1 (AD) | 13 (14.0) |

**Table 1.** Baseline characteristics of the included studies. The majority of the papers enrolled trauma patients receiving blood products and/or showing signs of hemodynamic instability. Hemodynamic instability was defined by vital parameters in most cases. Most of the data was collected retrospectively. The number of participants in each dataset ranged from 15 to 428. There is a significant heterogeneity in mortality between datasets. The need for massive transfusion is accompanied by a prominently high mortality rate. A mean heart rate (HR) > 120 bpm does not entail an outstanding mortality rate.

\*only cohort B consisted of trauma patients with active bleeding

PH=prehospital, AD=upon admission, pRBC=packed red blood cells, RCT=randomized controlled trial, SBP=systolic blood pressure, DBP=diastolic blood pressure, MAP=mean arterial pressure, ISS=injury severity score, HR=heart rate, bpm=beats per minute, BD=base deficit, FAST=focused assessment with sonography for trauma

### 184 Study quality

185 The methodological quality of the enrolled papers was investigated with QUIPS tool. The domain ‘Study attrition’ was not suitable for the retrospective studies. In 5 prospective studies, a moderate risk for study attrition bias was identified. All papers were judged to carry a low risk of bias in ‘Study participation’ and ‘Prognostic factor measurement’ domains. In contrast, almost half of the records were accompanied by a moderate risk of bias with regards to ‘Study confounding’, since the role of important confounders was not clarified in these reports. The results of the QUIPS assessment are shown in Figure 2.

191 **Fig. 2** Risk of bias assessment

### 192 Primary meta-regression

193 Our primary meta-regression investigated the relation between HR and mortality in trauma patients with hemorrhage based on all 19 datasets. We found no significant relation between HR and the outcome ( $p=0.847$ ); thus, a linear association could not be confirmed. The results with the regression line are demonstrated in Figure 3.

197 **Fig. 3** Relation between HR and mortality of bleeding trauma patients

### 198 Subgroup analysis

199 Due to the relative heterogeneity of the patient enrollment criteria of the individual papers, a subgroup of 10 studies utilizing the use of blood products in the initial management as inclusion criteria was formed and analyzed separately. Again, our findings demonstrated no significant relation and linear association between HR and mortality rate (Fig. 4).

203 **Fig. 4** Subgroup analysis of studies on trauma patients who received blood products

## 204 DISCUSSION

### 205 Interpretation of results

206 The present study was designed to investigate and update current knowledge on the relation between  
 207 HR and mortality in bleeding trauma patients. We identified 19 studies providing early HR and mortality  
 208 data on trauma patients with hemorrhage from the past 10 years through database search. Due to the  
 209 relative heterogeneity of the patient enrollment criteria of the individual papers, a subgroup of 10 records  
 210 was created. Each of these 10 studies provided data on trauma patients who received blood products.  
 211 Meta regressions were conducted on the data of all records and the subgroup, respectively.  
 212 No significant relation was found between HR and mortality in our meta regressions. This result supports  
 213 the evidence provided by studies doubting the value of HR in the initial assessment of potentially  
 214 bleeding trauma patients. Additionally, our findings raise further concerns over the validity of HR in the  
 215 ATLS classification of hypovolemic shock.  
 216 HR is an easily accessible vital parameter that indubitably reacts to circulatory volume depletion [5,6].  
 217 However, the complexity of this reaction seems to contain too many possibilities for misinterpretation to  
 218 be used in the simplified scheme presented by ATLS. The current classification of hypovolemic shock  
 219 suggests that HR increases continuously parallel to the severity of bleeding. The increase can stagnate  
 220 between class I-II and III-IV according to ATLS.[3] This scheme seems to be incongruent with the  
 221 existing literature on the physiology of HR change during intravascular volume depletion. The HR  
 222 response tends to follow a biphasic or triphasic pattern instead of continuous increase [8,10,11]. If it  
 223 comes to a decrease or stagnation in HR value, it is likely to occur at two separate stages of hemorrhage.  
 224 First, due to increased vagal activity caused by a Bezold-Jarisch-like reflex just around 30% blood  
 225 loss,[5,10] between shock classes II and III, where ATLS suggests a clear increase in HR. Secondly, at  
 226 the end stage of hemorrhage, bradycardia appears preceding cardiac arrest.[15,23,24] Based on these  
 227 observations, the pattern of HR alterations during hemorrhage suggested by ATLS may reflect the  
 228 clinical condition more accurately after minor modifications (Table 2).

| <i>Severity classes</i>      |                  | <i>Class I</i> | <i>Class II</i> | <i>Class III</i> | <i>Class IV</i>     |
|------------------------------|------------------|----------------|-----------------|------------------|---------------------|
| <i>Estimated blood loss</i>  |                  | <15%           | 15-30%          | 31-40%           | >40%                |
| <i>Physiologic variables</i> | HR               | ↔              | ↔/↑             | ↑                | ↑/↑↑                |
|                              | HR*              | ↔              | ↑               | ↔/↑              | ↓/↑                 |
|                              | SBP              | ↔              | ↔               | ↔/↓              | ↓                   |
|                              | GCS              | ↔              | ↔               | ↓                | ↓                   |
|                              | Pulse pressure   | ↔              | ↓               | ↓                | ↓                   |
|                              | Respiratory rate | ↔              | ↔               | ↑                | ↑                   |
|                              | Urine output     | ↔              | ↔               | ↓                | ↓↓                  |
|                              | BD               | 0-2 mEq        | 2-6 mEq         | 6-10 mEq         | ≥10 mEq             |
| Transfusion                  |                  | Monitor        | Possible        | Yes              | Massive transfusion |

1  
2  
3 **Table 2.** Advanced Trauma Life Support (ATLS) classification of hypovolemic shock including  
4 suggested modifications in the pattern of heart rate (HR) derangements. The table is based on the 10th  
5 edition of ATLS. Estimated blood loss is shown as percentage of total blood volume.

6 \*The suggested modifications are highlighted in bold: possible stagnation in HR value is indicated  
7 around 30% blood loss due to increased vagal activity. The possibility of bradycardia in profound  
8 bleeding in Class IV is highlighted

9 HR=heart rate, SBP=systolic blood pressure, GCS=Glasgow Coma Scale, BD=base deficit

10  
11 Despite criticism, HR is a promptly available vital sign that may lead physicians in the right direction in  
12 a relatively high percentage of cases when it comes to the initial management of potentially bleeding  
13 trauma patients. However, the question remains if it is effective enough to be taken into consideration  
14  
15  
16  
17  
18  
19  
20  
21  
22  
23  
24  
25  
26  
27  
28  
29  
30  
31  
32  
33  
34  
35  
36  
37  
38  
39  
40  
41  
42  
43  
44  
45  
46  
47  
48  
49  
50  
51  
52  
53  
54  
55  
56  
57  
58  
59  
60

236 Despite criticism, HR is a promptly available vital sign that may lead physicians in the right direction in  
237 a relatively high percentage of cases when it comes to the initial management of potentially bleeding  
238 trauma patients. However, the question remains if it is effective enough to be taken into consideration  
239 when we can also rely on parameters with higher sensitivity and specificity for bleeding – such as base  
240 deficit. Multiple studies have presented the inferiority of HR as compared to other predictors included  
241 in the ATLS criteria such as systolic blood pressure (SBP), Glasgow Coma Scale (GCS) and base deficit  
242 (BD).[25,26] Based on these concerns, the role of HR in the classification of hypovolemic shock and  
243 the initial management of the severely injured should be re-evaluated.

#### 244 **Strengths and limitations**

245 Our study focuses on injury-related severe hemorrhage, a condition carrying high clinical importance.  
246 In the previous decades, trauma care has gone through remarkable development. On that note, we  
247 decided to use scientific data only from the past 10 years. The included papers were judged to carry a  
248 relatively low risk of bias.

249 Naturally, our study also has its limitations. Although mortality is a highly objective outcome and we  
250 included patients only with significant hemorrhage, the direct cause of death may be difficult to  
251 determine in some cases. Prehospital measures may have affected the HR values registered upon  
252 admission. There is a notable difference in patient number among some of the included studies. The  
253 characteristics of the patient population by the individual records show a significant heterogeneity. To  
254 minimize this, a subgroup analysis was performed on patients who received blood products during initial  
255 in-hospital trauma care. These limitations prevented us from performing an adequate meta-analysis;  
256 however, we believe that we managed to raise attention on a clinically important issue.

#### 257 **Conclusions**

258 The legitimacy of HR in the initial assessment of hypovolemic shock seems to be obvious, but in fact, its  
259 usefulness is questionable due to unsatisfactory sensitivity and specificity. The complexity of HR  
260 response during hemorrhage leads to the possibility of misinterpretation, false sense of hemodynamic  
261 stability and consequent delay in adequate therapy.

262 Further research is required to reappraise HR as a physiologic variable in the ATLS classification of  
263 hypovolemic shock. As a reaction frequently associated with bleeding, tachycardia should raise  
264 suspicion for hemorrhage, but it might not be appropriate as one of the determining factors of therapeutic  
265 decisions, such as administration of blood products. In addition to the literature demonstrating the multi-

1  
2  
3 266 phasic response of HR to bleeding, our study presents the lack of linear association with mortality.  
4 267 Considering these, modifying the pattern of HR derangements in the ATLS shock classification may  
5 268 make this pragmatic guide even more precise.  
6  
7  
8  
9

## 10 269 **STATEMENTS**

### 11 270 **Conflict of Interests**

12 271 The authors declare that the research was conducted in the absence of any commercial or financial  
13 272 relationships that could be construed as a potential conflict of interest.

### 14 273 **Funding**

15 274 The study was funded by the following National Research Development and Innovation Office grant:  
16 275 FK138839. PH was further supported by the Bolyai János Grant of the Hungarian Science Academy:  
17 276 BO/00605/21/5. PJ was funded by the Human Resource Development Operational Programme Grant:  
18 277 EFOP- 3.6.3-VEKOP-16-2017-00009. Funders did not influence the design and scientific content of our  
19 278 paper in any way.

### 20 279 **Authors' contributions**

21 280 PJ: preparation of the draft of the manuscript, contribution in study design, selection of studies, data  
22 281 extraction; LH: statistical analysis, interpretation of data; PH: expert in the field of internal medicine,  
23 282 provided revisions to the scientific content of the manuscript; EC: expert in the field of traumatology,  
24 283 substantial contribution in study design and interpretation of data, provided revisions to the scientific  
25 284 content of the manuscript; EB: data extraction, preparation of the standardized data collection sheet; TH:  
26 285 risk of bias assessment, stylistic and grammatical revision of the manuscript; IG: substantial contribution  
27 286 in study design, selection of studies, data extraction; AL: formatting the manuscript, stylistic revision of  
28 287 the manuscript; AS: statistical analysis, interpretation of data; ZR: risk of bias assessment, preparation  
29 288 of the manuscript; EP: participation in the design of the study and its coordination; JT: provided revisions  
30 289 to the scientific content of the manuscript, validation of data extraction; PH: study design, preparation  
31 290 of the manuscript, provided revisions to the scientific content of the manuscript  
32 291 Hereby, all authors certify that they have participated sufficiently in the work to take public  
33 292 responsibility for the content.

### 34 293 **Ethics approval and consent to participate**

35 294 Not applicable.

### 36 295 **Consent for publication**

37 296 Not applicable.

### 38 297 **Availability of data and materials**

1  
2  
3 298 Our study uses published data only. The original contributions presented in the study are included in the  
4 299 article and supplementary material, further inquiries can be directed to the corresponding author.

### 300 **Patient and public involvement**

301 Patients and public were not specifically involved in designing the study.

### 302 **Acknowledgements**

303 There are no acknowledgements in association with the present study.

### 304 **REFERENCES**

- 305 1. Mutschler M, Paffrath T, Wöfl C, Probst C, Nienaber U, Schipper IB, et al. The ATLS®  
306 classification of hypovolaemic shock: a well established teaching tool on the edge? *Injury*. (2014) 3:S35-  
307 8. doi: 10.1016/j.injury.2014.08.015.
- 308 2. Evans JA, van Wessem KJ, McDougall D, Lee KA, Lyons T, Balogh ZJ. Epidemiology of traumatic  
309 deaths: comprehensive population-based assessment. *World J Surg*. (2010) 34:158-63.  
310 <https://doi.org/10.1007/s00268-009-0266-1>
- 311 3. Henry S, Brasel K, Stewart RM, American College of Surgeons. "Shock". In: Henry S, Brasel K,  
312 Stewart RM, editors. *Advanced trauma life support: student course manual*. Chicago, IL (2018). p. 42-  
313 61.
- 314 4. Brasel KJ, Guse C, Gentilello LM, Nirula R. Heart rate: is it truly a vital sign? *J Trauma* (2007)  
315 62:812-7. doi: 10.1097/TA.0b013e31803245a1
- 316 5. Secher NH and Van Lieshout JJ. Heart rate during haemorrhage: time for reappraisal. *J Physiol* (2010)  
317 588:19. doi: 10.1113/jphysiol.2009.184499
- 318 6. Guyton AC. *Textbook of Medical Physiology*. Philadelphia (1986). 332-43 p.
- 319 7. Braunwald E, Williams GH. "Alterations in arterial pressure and the shock syndrome". In: Jameson  
320 JL, editor. *Harrison's principles of internal medicine*. (1987). p. 153-6.
- 321 8. Guly HR, Bouamra O, Spiers M, Dark P, Coats T, Lecky FE. Vital signs and estimated blood loss in  
322 patients with major trauma: testing the validity of the ATLS classification of hypovolaemic shock.  
323 *Resuscitation*. (2011) 82:556-9. doi: 10.1016/j.resuscitation.2011.01.013.
- 324 9. Victorino GP, Battistella FD, Wisner DH. Does tachycardia correlate with hypotension after trauma?  
325 *J Am Coll Surg* (2003) 196:679-84. doi: 10.1016/S1072-7515(03)00128-5
- 326 10. Jacobsen J and Secher NH. Heart rate during haemorrhagic shock. *Clin Physiol* (1992) 12:659-66.  
327 doi: 10.1111/j.1475-097x.1992.tb00369.x

- 1  
2  
3 328 11. Little RA, Kirkman E, Driscoll P, Hanson J, Mackway-Joneset K. Preventable deaths after injury:  
4 329 why are the traditional 'vital' signs poor indicators of blood loss? *Journal of accident & emergency*  
5 330 *medicine* (1995) 12:1-14. doi: 10.1136/emj.12.1.1  
6  
7  
8 331 12. Mutschler M, Nienaber U, Brockamp T, Wafaisade A, Fabian T, Paffrath T, et al. Renaissance of  
9 332 base deficit for the initial assessment of trauma patients: a base deficit-based classification for  
10 333 hypovolemic shock developed on data from 16,305 patients derived from the TraumaRegister DGU®.  
11 334 *Crit Care* (2013) 17:R42. doi: 10.1186/cc12555.  
12  
13 335 13. Mizushima Y, Ueno M, Watanabe H, Ishikawa K, Matsuoka T. Discrepancy between heart rate and  
14 336 makers of hypoperfusion is a predictor of mortality in trauma patients. *J Trauma*. (2011) 71:789-92. doi:  
15 337 10.1097/TA.0b013e31822f7bbd0020  
16  
17 338 14. Ley EJ, Singer MB, Clond MA, Ley HC, Mirocha J, Bukur M, et al. Admission heart rate is a  
18 339 predictor of mortality. *J Trauma Acute Care Surg*. (2012) 72:943-47. doi:  
19 340 10.1097/TA.0b013e3182465527  
20  
21 341 15. Ageron FX, Gayet-Ageron A, Steyeberg E, Bouzat P, Roberts Ian. Prognostic model for traumatic  
22 342 death due to bleeding: cross-sectional international study. *BMJ Open* (2019) 9:e2044-6055. doi:  
23 343 10.1136/bmjopen-2018-026823  
24  
25 344 16. Shakur H, Roberts I, Bautista R, Caballero J, Coats T, Dewanet Y, et al. Effects of tranexamic acid  
26 345 on death, vascular occlusive events, and blood transfusion in trauma patients with significant  
27 346 haemorrhage (CRASH-2): a randomised, placebo-controlled trial. *Lancet* (2010) 376:23-32. doi:  
28 347 10.1016/S0140-6736(10)60835-5  
29  
30 348 17. Boling B, Moore K. Tranexamic acid (TXA) use in trauma. *J Emerg Nurs* (2012) 38:496-7. doi:  
31 349 10.1016/j.jen.2012.06.001  
32  
33 350 18. Cole E, Davenport R, Willett K, Brohi K. Tranexamic acid use in severely injured civilian patients  
34 351 and the effects on outcomes: a prospective cohort study. *Ann Surg*. (2015) 261:390-4. doi:  
35 352 10.1097/SLA.0000000000000717  
36  
37 353 19. Kutcher ME, Kornblith LZ, Narayan R, Curd V, Daley AT, Redick BJ, et al. A paradigm shift in  
38 354 trauma resuscitation: evaluation of evolving massive transfusion practices. *JAMA Surg*. (2013) 148:834-  
39 355 40. doi: 10.1001/jamasurg.2013.2911  
40  
41 356 20. Moher D, Shamseer L, Clarke M, Ghersi D, Liberati A, Petticrew M, et al. Preferred reporting items  
42 357 for systematic review and meta-analysis protocols (PRISMA-P) 2015 statement. *Syst Rev* (2015) 4:1.  
43 358 doi: 10.1186/2046-4053-4-1  
44  
45  
46  
47  
48  
49  
50  
51  
52  
53  
54  
55  
56  
57  
58  
59  
60

- 1  
2  
3 359 21. Hayden JA, van der Windt DA, Cartwright JL, Côté P, Bombardier C. Assessing bias in studies of  
4 360 prognostic factors. *Ann Intern Med.* (2013) 158:280-6. doi: 10.7326/0003-4819-158-4-201302190-  
5 361 00009  
6  
7  
8 362 22. Wan X, Wang W, Liu J, Tong T. Estimating the sample mean and standard deviation from the sample  
9 363 size, median, range and/or interquartile range. *BMC Med Res Methodol* (2014) 14:135. doi:  
10 364 10.1186/1471-2288-14-135  
11  
12  
13 365 23. Barriot P, Riou B. Hemorrhagic shock with paradoxical bradycardia. *Intensive Care Med* (1987)  
14 366 13:203-7. doi: 10.1007/BF00254705  
15  
16  
17 367 24. Hooper N, Armstrong TJ. Hemorrhagic Shock. (2020).  
18 368 <https://www.ncbi.nlm.nih.gov/books/NBK470382/> [Accessed: February 25, 2021]  
19  
20  
21 369 25. Perel P, Prieto-Merino D, Shakur H, Clayton T, Lecky F, Bouamra O, et al. Predicting early death  
22 370 in patients with traumatic bleeding: development and validation of prognostic model. *BMJ* (2012)  
23 371 345:e5166. doi:10.1136/bmj.e5166  
24  
25  
26 372 26. Jávör P, Csonka E, Butt E, Rárosi F, Babik B, Török L, et al. Comparison of the previous and current  
27 373 trauma-related shock classifications – A retrospective cohort study from a level I trauma centre. *Eur*  
28 374 *Surg Res* (2021) doi: 10.1159/000516102  
29  
30  
31 375 27. Bohonek M, Kutac D, Landova L, Koranova M, Sladkova E, Staskova E, et al. The use of  
32 376 cryopreserved platelets in the treatment of polytraumatic patients and patients with massive bleeding.  
33 377 *Transfusion* (2019) 59:1474-78. doi: 10.1111/trf.15177  
34  
35  
36 378 28. Boudreau RM, Deshpande KK, Day GM, Hinckley WR, Harger N, Pritts TA, et al. Prehospital  
37 379 Tranexamic Acid Administration During Aeromedical Transport After Injury. *J Surg Res* (2019)  
38 380 233:132-38. doi: 10.1016/j.jss.2018.07.074  
39  
40  
41 381 29. Duchesne J, Costantini TW, Khan M, Taub E, Rhee P, Morse B, et al. The effect of hemorrhage  
42 382 control adjuncts on outcome in severe pelvic fracture: A multi-institutional study. *J Trauma Acute Care*  
43 383 *Surg* (2019) 87:117-24. doi: 10.1097/TA.0000000000002316  
44  
45  
46 384 30. Montazer SH, Jahanian F, Khatir IG, Bozorgi F, Assadi T, Pashaei SM, et al. Prognostic Value of  
47 385 Cardiac Troponin I and T on Admission in Mortality of Multiple Trauma Patients Admitted to the  
48 386 Emergency Department: a Prospective Follow-up Study. *Med Arch* (2019) 73:11-14. doi:  
49 387 10.5455/medarh.2019.73.11-14  
50  
51  
52 388 31. Priestley EM, Inaba K, Byerly S, Biswas S, Wong MD, Lam L, et al. Pulse Pressure as an Early  
53 389 Warning of Hemorrhage in Trauma Patients. *J Am Coll Surg* (2019) 229(2):184-191. doi:  
54 390 10.1016/j.jamcollsurg.2019.03.021  
55  
56  
57  
58  
59  
60



- 1  
2  
3 391 32. Barmparas G, Dhillon NK, Smith EJ, Mason R, Melo N, Thomsen GM, et al. Patterns of vasopressor  
4 392 utilization during the resuscitation of massively transfused trauma patients. *Injury* (2018) 49:8-14. doi:  
5 393 10.1016/j.injury.2017.09.021  
6  
7  
8 394 33. Chaochankit W, Akaraborworn O, Sangthong B, Thongkhao K. Combination of blood lactate level  
9 395 with assessment of blood consumption (ABC) scoring system: A more accurate predictor of massive  
10 396 transfusion requirement. *Chin J Traumatol.* (2018) 21:96-9. doi: 10.1016/j.cjte.2017.12.003  
11  
12  
13 397 34. Moore HB, Moore EE, Chapman MP, McVaney K, Bryskiewicz G, Blechar R, et al. Plasma-first  
14 398 resuscitation to treat haemorrhagic shock during emergency ground transportation in an urban area: a  
15 399 randomised trial. *Lancet* (2018) 392:283-91. doi: 10.1016/S0140-6736(18)31553-8  
16  
17  
18 400 35. Ng M, Perrott J, Burgess S. Evaluation of tranexamic acid in trauma patients: A retrospective  
19 401 quantitative analysis. *Am J Emerg Med.* (2019) 37:444-9. doi: 10.1016/j.ajem.2018.06.010  
20  
21  
22 402 36. Guo SB, Chen YX, Yu XZ. Clinical Characteristics and Current Interventions in Shock Patients in  
23 403 Chinese Emergency Departments: A Multicenter Prospective Cohort Study. *Chin Med J* (2017)  
24 404 130:1146-54. doi: 10.4103/0366-6999.205862  
25  
26  
27 405 37. Heidari K, Taghizadeh M, Mahmoudi S, Panahi H, Shad EG, Asadollahi S. FAST for blunt  
28 406 abdominal trauma: Correlation between positive findings and admission acid-base measurement. *Am J*  
29 407 *Emerg Med* (2017) 35:823-9. doi: 10.1016/j.ajem.2017.01.035  
30  
31  
32 408 38. Luehr E, Grone G, Pathak M, Austin C, Thompson S. Administration of tranexamic acid in trauma  
33 409 patients under stricter inclusion criteria increases the treatment window for stabilization from 24 to 48  
34 410 hours-a retrospective review. *Int J Burns Trauma* (2017) 7:115-9  
35  
36  
37 411 39. Naumann DN, Hazeldine J, Dinsdale RJ, Bishop JR, Midwinter MJ, Harrison P, et al.  
38 412 Endotheliopathy is associated with higher levels of cell-free DNA following major trauma: A  
39 413 prospective observational study. *PLoS One* (2017) 12:e0189870. doi: 10.1371/journal.pone.0189870  
40  
41  
42 414 40. Savage SA, Zarzaur BL, Brewer BL, Lim GH, Martin AC, Magnotti LJ, et al. 1: 1 Transfusion  
43 415 strategies are right for the wrong reasons. *J Trauma Acute Care Surg* (2017) 82:845-52. doi:  
44 416 10.1097/TA.0000000000001402  
45  
46  
47 417 41. Day DL, Anzelon KM, Conde FA. Association of Prehospital Shock Index and Trauma Bay  
48 418 Uncrossmatched Red Blood Cell Transfusion With Multiple Transfusion. *J Trauma Nurs* (2016) 23:89-  
49 419 95. doi: 10.1097/JTN.0000000000000192  
50  
51  
52 420 42. Ordonez CA, Herrera-Escobar JP, Parra MW, Rodriguez-Ossa PA, Mejia DA, Sanchez AI, et al.  
53 421 Computed tomography in hemodynamically unstable severely injured blunt and penetrating trauma  
54 422 patients. *J Trauma Acute Care Surg* (2016) 80:597-602. doi: 10.1097/TA.0000000000000975  
55  
56  
57  
58  
59  
60

423 43. Shah AA, Rehman A, Shah SJ, Haider AH, Zogg CH, Zafar SN, et al. Abdominal gunshot wounds-a  
 424 comparative assessment of severity measures. *J Surg Res* (2015) 198:334-9. doi:  
 425 10.1016/j.jss.2015.03.061

426 44. Thurston B, Chowdhury S, Edu S, Nicol AJ, Navsaria PH. Time since injury is the major factor in  
 427 preventing tranexamic acid use in the trauma setting: An observational cohort study from a major trauma  
 428 centre in a middle-income country. *S Afr J Surg* (2015) 53:13-8. doi: 10.7196/SAJS.2250

429 45. Sisak K, Manolis M, Hardy BM, Enninghorst N, Bendinelli C, Balogh ZsJ. Acute transfusion  
 430 practice during trauma resuscitation: who, when, where and why? *Injury* (2013) 44:581-6. doi:  
 431 10.1016/j.injury.2012.08.031

## 432 **FIGURE LEGENDS**

433 **Fig. 1.** Study flowchart. Our search strategy resulted 2017 papers. After excluding articles published  
 434 before 2010 and duplicates, a systematic screening was performed. Ultimately, 19 studies were enrolled  
 435 to our meta-regression

436 \*heart rate (HR) was not provided in mean or median, only the number of patients in ranges of HR (e.g.,  
 437 100-120 bpm) was given

438 **Fig. 2.** Risk of bias assessment.

439 **a:** The figure shows the risk of bias in the 6 main domains of the Quality In Prognostic Studies (QUIPS)  
 440 assessment, in each paper. ‘Study attrition’ was not suitable for the retrospective studies. In 5 prospective  
 441 studies, there was a moderate risk for study attrition bias. All studies were judged to carry a low risk of  
 442 bias in ‘Study participation’ and ‘Prognostic factor measurement’ domains. ‘Study confounding’ was  
 443 the worst rated domain: a moderate risk appeared in almost half of the records, in which the role of  
 444 important confounders was not reported thoroughly. Based on the assessment of the 6 main domains,  
 445 the overall risk of bias was determined for each study

446 **b:** The summarized risk of bias is illustrated in percentages in the main domains

447 **Fig. 3.** Relation between heart rate (HR) and mortality of bleeding trauma patients. Linear association  
 448 between HR and mortality could not be identified.

449 HR=heart rate

450 **Fig. 4.** Subgroup analysis of studies on trauma patients who received blood products. Linear association  
 451 between early heart rate (HR) and mortality rate of patients could not be identified.

452 HR=heart rate

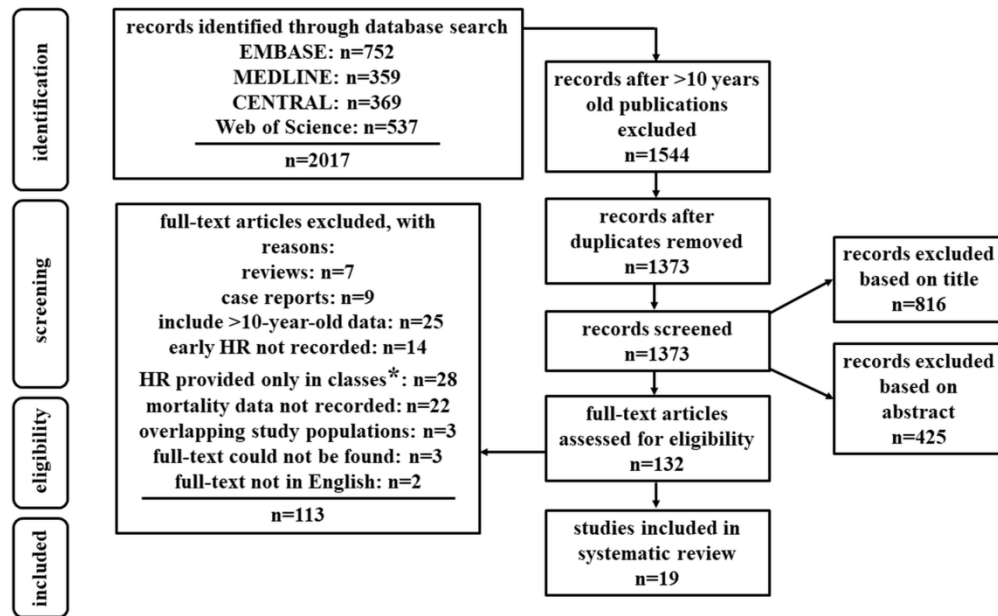

Fig. 1. PRISMA flow diagram. Our search strategy resulted 2017 papers. After excluding articles published before 2010 and duplicates, 1373 papers were screened based on title and abstract. In 79 cases the title clearly indicated non-eligible study design such as review or systematic review. Twenty-four title pointed out that the paper is a case report of a sole case. In 124 cases, the title clearly indicated non-eligible study population such as pregnant or pediatric. Five hundred sixteen titles revealed that the study is not closely related to our research topic. In 73 cases the title clearly indicated an animal experiment. Twenty-one records were excluded based on abstract due to a non-eligible study design such as review or systematic review. The abstract indicated a non-eligible study population such as pregnant or pediatric in 94 cases. In 110 cases, the abstract indicated that the study is not closely related to our research topic. Thirty-nine animal experiments were filtered out based on abstract. Eight studies did not have an English language abstract. In 112 cases, the abstract revealed that the study includes data that is more than 10 years old. Forty-one case reports with a patient number <10 were excluded based on abstract. After excluding a total of 816 papers based on title and 425 based on abstract, 132 full-texts were assessed for eligibility. Reasons for non-inclusion of full-text articles are detailed above in the Figure. Ultimately, 19 studies were enrolled to our meta-regression

\*heart rate (HR) was not provided in mean or median, only the number of patients in ranges of HR (e.g., 100-120 bpm) was given

170x105mm (300 x 300 DPI)

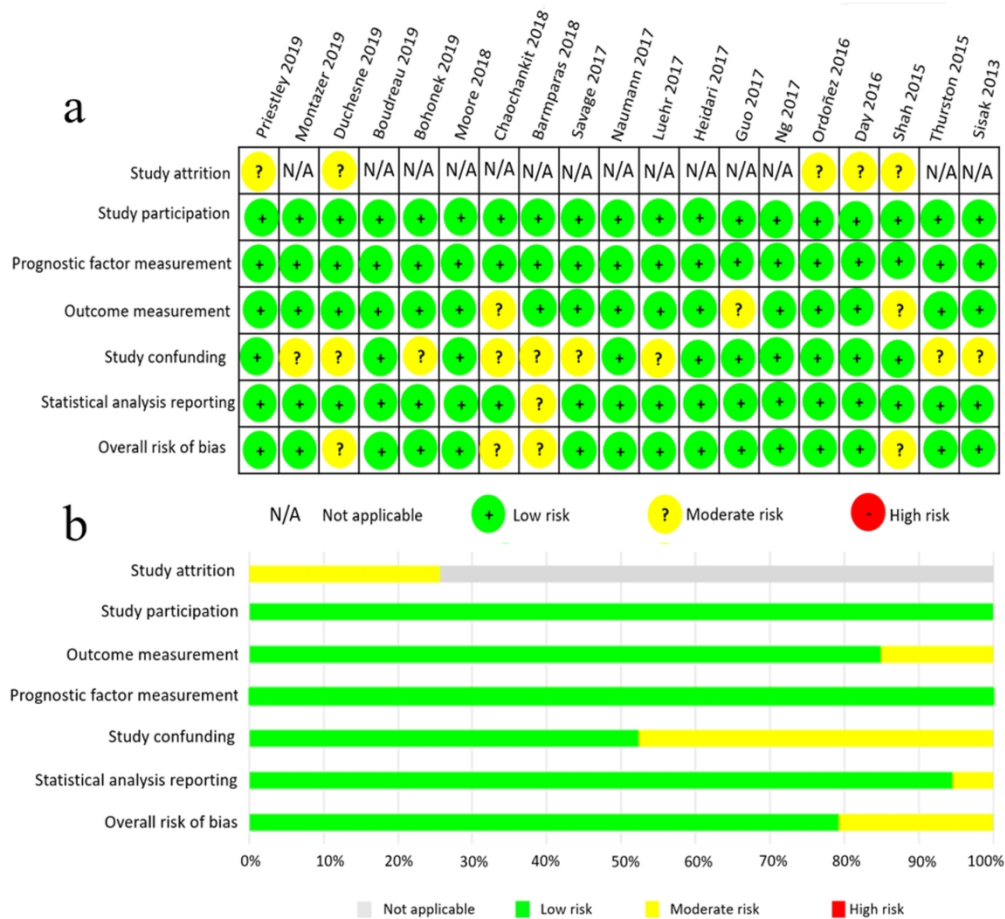

Fig. 2. Risk of bias assessment.

a: The figure shows the risk of bias in the 6 main domains of the Quality In Prognostic Studies (QUIPS) assessment, in each paper. 'Study attrition' was not suitable for the retrospective studies. In 5 prospective studies, there was a moderate risk for study attrition bias. All studies were judged to carry a low risk of bias in 'Study participation' and 'Prognostic factor measurement' domains. 'Study confounding' was the worst rated domain: a moderate risk appeared in almost half of the records, in which the role of important confounders was not reported thoroughly. Based on the assessment of the 6 main domains, the overall risk of bias was determined for each study

b: The summarized risk of bias is illustrated in percentages in the main domains

170x155mm (300 x 300 DPI)

1  
2  
3  
4  
5  
6  
7  
8  
9  
10  
11  
12  
13  
14  
15  
16  
17  
18  
19  
20  
21  
22  
23  
24  
25  
26  
27  
28  
29  
30  
31  
32  
33  
34  
35  
36  
37  
38  
39  
40  
41  
42  
43  
44  
45  
46  
47  
48  
49  
50  
51  
52  
53  
54  
55  
56  
57  
58  
59  
60

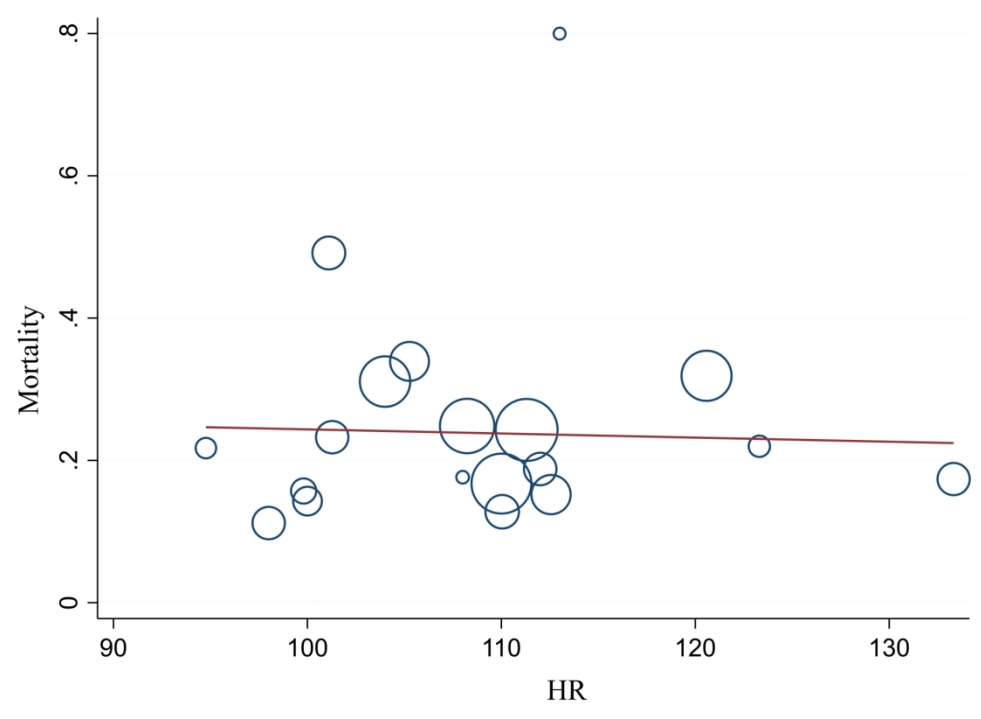

Fig. 3. Relation between heart rate (HR) and mortality of bleeding trauma patients. Linear association between HR and mortality could not be identified.  
HR=heart rate

170x123mm (300 x 300 DPI)

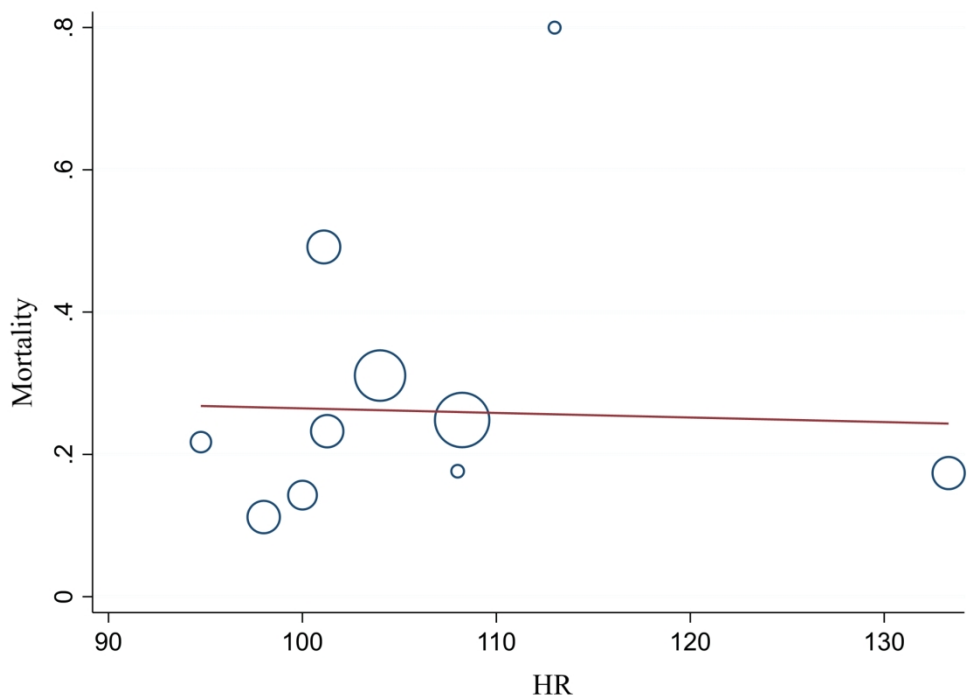

Fig. 4. Subgroup analysis of studies on trauma patients who received blood products. Linear association between early heart rate (HR) and mortality rate of patients could not be identified.  
HR=heart rate

170x123mm (300 x 300 DPI)

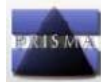

## PRISMA 2020 Checklist

| Section and Topic             | Item # | Checklist item                                                                                                                                                                                                                                                                                       | Location where item is reported (Page nr.) |
|-------------------------------|--------|------------------------------------------------------------------------------------------------------------------------------------------------------------------------------------------------------------------------------------------------------------------------------------------------------|--------------------------------------------|
| <b>TITLE</b>                  |        |                                                                                                                                                                                                                                                                                                      |                                            |
| Title                         | 1      | Identify the report as a systematic review.                                                                                                                                                                                                                                                          | 1                                          |
| <b>ABSTRACT</b>               |        |                                                                                                                                                                                                                                                                                                      |                                            |
| Abstract                      | 2      | See the PRISMA 2020 for Abstracts checklist.                                                                                                                                                                                                                                                         | 2                                          |
| <b>INTRODUCTION</b>           |        |                                                                                                                                                                                                                                                                                                      |                                            |
| Rationale                     | 3      | Describe the rationale for the review in the context of existing knowledge.                                                                                                                                                                                                                          | 2-3                                        |
| Objectives                    | 4      | Provide an explicit statement of the objective(s) or question(s) the review addresses.                                                                                                                                                                                                               | 3                                          |
| <b>METHODS</b>                |        |                                                                                                                                                                                                                                                                                                      |                                            |
| Eligibility criteria          | 5      | Specify the inclusion and exclusion criteria for the review and how studies were grouped for the syntheses.                                                                                                                                                                                          | 4                                          |
| Information sources           | 6      | Specify all databases, registers, websites, organisations, reference lists and other sources searched or consulted to identify studies. Specify the date when each source was last searched or consulted.                                                                                            | 4                                          |
| Search strategy               | 7      | Present the full search strategies for all databases, registers and websites, including any filters and limits used.                                                                                                                                                                                 | 4                                          |
| Selection process             | 8      | Specify the methods used to decide whether a study met the inclusion criteria of the review, including how many reviewers screened each record and each report retrieved, whether they worked independently, and if applicable, details of automation tools used in the process.                     | 4-5                                        |
| Data collection process       | 9      | Specify the methods used to collect data from reports, including how many reviewers collected data from each report, whether they worked independently, any processes for obtaining or confirming data from study investigators, and if applicable, details of automation tools used in the process. | 4, 10                                      |
| Data items                    | 10a    | List and define all outcomes for which data were sought. Specify whether all results that were compatible with each outcome domain in each study were sought (e.g. for all measures, time points, analyses), and if not, the methods used to decide which results to collect.                        | 5                                          |
|                               | 10b    | List and define all other variables for which data were sought (e.g. participant and intervention characteristics, funding sources). Describe any assumptions made about any missing or unclear information.                                                                                         | 4                                          |
| Study risk of bias assessment | 11     | Specify the methods used to assess risk of bias in the included studies, including details of the tool(s) used, how many reviewers assessed each study and whether they worked independently, and if applicable, details of automation tools used in the process.                                    | 5                                          |
| Effect measures               | 12     | Specify for each outcome the effect measure(s) (e.g. risk ratio, mean difference) used in the synthesis or presentation of results.                                                                                                                                                                  | 5                                          |
| Synthesis methods             | 13a    | Describe the processes used to decide which studies were eligible for each synthesis (e.g. tabulating the study intervention characteristics and comparing against the planned groups for each synthesis (item #5)).                                                                                 | -                                          |
|                               | 13b    | Describe any methods required to prepare the data for presentation or synthesis, such as handling of missing summary statistics, or data conversions.                                                                                                                                                | -                                          |
|                               | 13c    | Describe any methods used to tabulate or visually display results of individual studies and syntheses.                                                                                                                                                                                               | -                                          |
|                               | 13d    | Describe any methods used to synthesize results and provide a rationale for the choice(s). If meta-analysis was performed, describe the model(s), method(s) to identify the presence and extent of statistical heterogeneity, and software package(s) used.                                          | -                                          |
|                               | 13e    | Describe any methods used to explore possible causes of heterogeneity among study results (e.g. subgroup analysis, meta-regression).                                                                                                                                                                 | -                                          |
|                               | 13f    | Describe any sensitivity analyses conducted to assess robustness of the synthesized results.                                                                                                                                                                                                         | -                                          |
| Reporting bias assessment     | 14     | Describe any methods used to assess risk of bias due to missing results in a synthesis (arising from reporting biases).                                                                                                                                                                              | 5                                          |

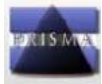

## PRISMA 2020 Checklist

| Section and Topic                              | Item # | Checklist item                                                                                                                                                                                                                                                                       | Location where item is reported (Page nr.) |
|------------------------------------------------|--------|--------------------------------------------------------------------------------------------------------------------------------------------------------------------------------------------------------------------------------------------------------------------------------------|--------------------------------------------|
| Certainty assessment                           | 15     | Describe any methods used to assess certainty (or confidence) in the body of evidence for an outcome.                                                                                                                                                                                | -                                          |
| <b>RESULTS</b>                                 |        |                                                                                                                                                                                                                                                                                      |                                            |
| Study selection                                | 16a    | Describe the results of the search and selection process, from the number of records identified in the search to the number of studies included in the review, ideally using a flow diagram.                                                                                         | 5, Fig. 1                                  |
|                                                | 16b    | Cite studies that might appear to meet the inclusion criteria, but which were excluded, and explain why they were excluded.                                                                                                                                                          | -                                          |
| Study characteristics                          | 17     | Cite each included study and present its characteristics.                                                                                                                                                                                                                            | 6 (Table 1)                                |
| Risk of bias in studies                        | 18     | Present assessments of risk of bias for each included study.                                                                                                                                                                                                                         | 6-7 (Fig. 2)                               |
| Results of individual studies                  | 19     | For all outcomes, present, for each study: (a) summary statistics for each group (where appropriate) and (b) an effect estimate and its precision (e.g. confidence/credible interval), ideally using structured tables or plots.                                                     | 7 (Fig 3-4)                                |
| Results of syntheses                           | 20a    | For each synthesis, briefly summarise the characteristics and risk of bias among contributing studies.                                                                                                                                                                               | -                                          |
|                                                | 20b    | Present results of all statistical syntheses conducted. If meta-analysis was done, present for each the summary estimate and its precision (e.g. confidence/credible interval) and measures of statistical heterogeneity. If comparing groups, describe the direction of the effect. | -                                          |
|                                                | 20c    | Present results of all investigations of possible causes of heterogeneity among study results.                                                                                                                                                                                       | -                                          |
|                                                | 20d    | Present results of all sensitivity analyses conducted to assess the robustness of the synthesized results.                                                                                                                                                                           | -                                          |
| Reporting biases                               | 21     | Present assessments of risk of bias due to missing results (arising from reporting biases) for each synthesis assessed.                                                                                                                                                              | 6-7, (Fig. 2)                              |
| Certainty of evidence                          | 22     | Present assessments of certainty (or confidence) in the body of evidence for each outcome assessed.                                                                                                                                                                                  | -                                          |
| <b>DISCUSSION</b>                              |        |                                                                                                                                                                                                                                                                                      |                                            |
| Discussion                                     | 23a    | Provide a general interpretation of the results in the context of other evidence.                                                                                                                                                                                                    | 7-8                                        |
|                                                | 23b    | Discuss any limitations of the evidence included in the review.                                                                                                                                                                                                                      | 9                                          |
|                                                | 23c    | Discuss any limitations of the review processes used.                                                                                                                                                                                                                                | 9                                          |
|                                                | 23d    | Discuss implications of the results for practice, policy, and future research.                                                                                                                                                                                                       | 9                                          |
| <b>OTHER INFORMATION</b>                       |        |                                                                                                                                                                                                                                                                                      |                                            |
| Registration and protocol                      | 24a    | Provide registration information for the review, including register name and registration number, or state that the review was not registered.                                                                                                                                       | 4                                          |
|                                                | 24b    | Indicate where the review protocol can be accessed, or state that a protocol was not prepared.                                                                                                                                                                                       | 4                                          |
|                                                | 24c    | Describe and explain any amendments to information provided at registration or in the protocol.                                                                                                                                                                                      | -                                          |
| Support                                        | 25     | Describe sources of financial or non-financial support for the review, and the role of the funders or sponsors in the review.                                                                                                                                                        | 9                                          |
| Competing interests                            | 26     | Declare any competing interests of review authors.                                                                                                                                                                                                                                   | 9                                          |
| Availability of data, code and other materials | 27     | Report which of the following are publicly available and where they can be found: template data collection forms; data extracted from included studies; data used for all analyses; analytic code; any other materials used in the review.                                           | 10                                         |



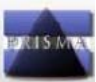

# PRISMA 2020 Checklist

1  
2  
3  
4  
5  
6  
7  
8  
9  
10  
11  
12  
13  
14  
15  
16  
17  
18  
19  
20  
21  
22  
23  
24  
25  
26  
27  
28  
29  
30  
31  
32  
33  
34  
35  
36  
37  
38  
39  
40  
41  
42  
43  
44  
45  
46  
47

From: Page MJ, McKenzie JE, Bossuyt PM, Boutron I, Hoffmann TC, Mulrow CD, et al. The PRISMA 2020 statement: an updated guideline for reporting systematic reviews. BMJ 2021;372:n71. doi: 10.1136/bmj.n71

For more information, visit: <http://www.prisma-statement.org/>

For peer review only

| Study: first author, year of publication | Data origin: institute, country                                                                              | Data collection: type, date                                | Patient characteristics                                                                                                                                          | Patient number | HR mean $\pm$ SD (PH/AD) | Mortality n, (%) |
|------------------------------------------|--------------------------------------------------------------------------------------------------------------|------------------------------------------------------------|------------------------------------------------------------------------------------------------------------------------------------------------------------------|----------------|--------------------------|------------------|
| Bohonek 2019                             | Military University Hospital Prague, Czech Republic                                                          | retrospective, single-center, 2014-2018                    | received blood products (fresh apheresis platelets or cryopreserved platelets)                                                                                   | 46             | 94.8 $\pm$ 59.0 (AD)     | 10 (21.7)        |
| Boudreau 2019                            | University of Cincinnati Medical Center, Cincinnati, Ohio, USA                                               | retrospective, single-center, April 2014 – October 2015    | received blood products and tranexamic acid                                                                                                                      | 116            | 101.3 $\pm$ 43.0 (PH)    | 27 (23.3)        |
| Duchesne 2019                            | 11 level I trauma centers, 1 level II trauma center from the USA                                             | retrospective, multi-center, January 2011 – December 2016  | pelvic fracture with SBP $\leq$ 90 mmHg and/or HR $\geq$ 120 bpm and/or BD $\geq$ 5 mEq                                                                          | 279            | 120.6 $\pm$ 27.7 (AD)    | 89 (32.0)        |
| Montazer 2019                            | Imam Khomeini Hospital, Sari, Iran                                                                           | prospective, single-center, March 2014 – February 2015     | multiple trauma with hemodynamic instability (not defined)                                                                                                       | 400            | 110.0 $\pm$ 14.0 (AD)    | 67 (16.7)        |
| Priestley 2019                           | LAC+USC Medical Center, LAC+USC blood bank database, University of Southern California, Los Angeles, CA, USA | retrospective, single-center, January 2010 – October 2014  | received 3 units of pRBC in any 60-minute period within 24 hours of admission and received interventional radiology or surgery for definitive hemorrhage control | 283            | 104.0 $\pm$ 24.0 (PH)    | 88 (31.1)        |
| Barmparas 2018                           | Cedars-Sinai Medical Center Los Angeles, CA, USA                                                             | retrospective, single-center, January 2011 – October 2016  | received massive transfusion (defined as 3 units of pRBC within the first hour from admission)                                                                   | 120            | 101.1 $\pm$ 39.7 (AD)    | 59 (49.2)        |
| Chaochankit 2018                         | Songklanagarind Hospital, Hat Yai, Thailand                                                                  | retrospective, single-center, January 2014 – December 2014 | received massive transfusion, met trauma team activation criteria                                                                                                | 15             | 113.0 $\pm$ 22.1 (AD)    | 12 (80.0)        |
| Moore 2018                               | Denver Health Medical Center, Denver, CO, USA                                                                | prospective, single-center, April 2014 – March 2017        | SBP $\leq$ 70 mmHg or 71-90 mmHg with HR $\geq$ 108 bpm                                                                                                          | 125            | 110.0 $\pm$ 15.9 (PH)    | 16 (12.8)        |
| Ng 2018                                  | British Columbia Trauma Registry, Canada                                                                     | retrospective, single-center, April 2012 – June 2015       | SBP $\leq$ 90 mmHg and/or HR $\geq$ 110 bpm                                                                                                                      | 117            | 112.0 $\pm$ 35.0 (AD)    | 22 (19.0)        |
| Guo 2017                                 | 33 academic hospitals in 16 Chinese                                                                          | prospective, multi-center, December 2013 – April 2014      | new-onset hypotension unexplained by any other cause than                                                                                                        | 428            | 111.3 $\pm$ 17.9 (AD)    | 104 (23.4)       |

|              |                                                                                                                                  |                                                            |                                                                                                                                                                                                                                            |     |                   |           |
|--------------|----------------------------------------------------------------------------------------------------------------------------------|------------------------------------------------------------|--------------------------------------------------------------------------------------------------------------------------------------------------------------------------------------------------------------------------------------------|-----|-------------------|-----------|
|              | provinces, China                                                                                                                 |                                                            | hemorrhage (SBP < 90 mmHg, DBP < 60 mmHg, or MAP < 65 mmHg or decreased SBP with more than 40 mmHg from baseline in a hypertensive patient), and signs of tissue hypoperfusion (tachycardia, oliguria, mottled skin, altered mental state) |     |                   |           |
| Heidari 2017 | 4 level I trauma centers from Iran                                                                                               | prospective, multi-center, April 2015 – September 2015     | blunt abdominal trauma with positive FAST                                                                                                                                                                                                  | 168 | 105.3 ± 23.4 (AD) | 57 (33.9) |
| Luehr 2017   | Mercy Hospital-Springfield, Springfield, MO, USA                                                                                 | retrospective, single-center, 2013 - 2016                  | received blood products and tranexamic acid                                                                                                                                                                                                | 115 | 133.3 ± 21.4 (PH) | 20 (17.4) |
| Naumann 2017 | University Hospitals Birmingham NHS Foundation Trust, Birmingham, UK                                                             | retrospective, single-center, July 2015 – January 2017     | received blood products, required intensive care and had a lactate value >2 mmol/l (cohort B*)                                                                                                                                             | 17  | 108.0 ± 16.2 (AD) | 3 (17.6)  |
| Savage 2017  | Indiana University School of Medicine, Indianapolis IN, USA; The University of Tennessee Health Science Center, Memphis, TN, USA | retrospective, multi-center, September 2013 – May 2015     | received at least one unit of pRBC within the first 24 hours of admission                                                                                                                                                                  | 330 | 108.2 ± 55.3 (AD) | 82 (24.8) |
| Day 2016     | The Queen's Medical Center, Honolulu, Hawaii, USA                                                                                | retrospective, single-center, September 2011 – March 2013  | received at least one unit of pRBC in the first 6 hours, met trauma team activation criteria                                                                                                                                               | 116 | 98.0 ± 24.0 (PH)  | 13 (11.0) |
| Ordoñez 2016 | Fundación Valle del Lili, University Hospital, Cali, Colombia                                                                    | retrospective, single-center, January 2012 – December 2013 | ISS > 15 with hemodynamic instability (SBP < 100 mmHg and/or HR > 100 bpm and/or the need for at least 4 units of packed red blood                                                                                                         | 171 | 112.6 ± 23.5 (AD) | 26 (15.2) |

|               |                                                                                                             |                                                            |                                                                                      |    |                   |           |
|---------------|-------------------------------------------------------------------------------------------------------------|------------------------------------------------------------|--------------------------------------------------------------------------------------|----|-------------------|-----------|
|               |                                                                                                             |                                                            | cells in the trauma bay)                                                             |    |                   |           |
| Shah 2015     | Aga Khan University Hospital, Karachi, Pakistan                                                             | retrospective, single-center, January 2011 – December 2012 | isolated abdominal gunshot wound                                                     | 70 | 99.8 ± 30.3 (AD)  | 11 (15.7) |
| Thurston 2015 | Trauma Center, Groote Schuur Hospital and Faculty of Health Sciences, University of Cape Town, South Africa | prospective, single-center, September 2013 – November 2013 | SBP < 90 mmHg and/or HR > 110 bpm at any time from admission to 3 hours after injury | 50 | 123.3 ± 13.1 (AD) | 11 (22.0) |
| Sisak 2013    | John Hunter Hospital and University of Newcastle, Newcastle, NSW, Australia                                 | prospective, single-center, January 2010 – January 2011    | received blood products within the first 24 hours from admission                     | 91 | 100.0 ± 30.1 (AD) | 13 (14.0) |

**Table S2.** Detailed description of the characteristics of the included studies. Most papers enrolled trauma patients receiving blood products and/or showing signs of hemodynamic instability. Hemodynamic instability was defined by vital parameters in most cases. Most of the data was collected retrospectively. The number of participants in each dataset ranged from 15 to 428. There is a significant heterogeneity in mortality between datasets. The need for massive transfusion is accompanied by a prominently high mortality rate. A mean heart rate (HR) > 120 bpm does not entail an outstanding mortality rate.

\*only cohort B consisted of trauma patients with active bleeding

PH=prehospital, AD=upon admission, pRBC=packed red blood cells, RCT=randomized controlled trial, SBP=systolic blood pressure, DBP=diastolic blood pressure, MAP=mean arterial pressure, ISS=injury severity score, HR=heart rate, bpm=beats per minute, BD=base deficit, FAST=focused assessment with sonography for trauma

# BMJ Open

## THE PREDICTIVE VALUE OF TACHYCARDIA FOR MORTALITY IN TRAUMA-RELATED HEMORRHAGIC SHOCK: A SYSTEMATIC REVIEW AND META-REGRESSION

|                                 |                                                                                                                                                                                                                                                                                                                                                                                                                                                                                                                                                                                                                                                                                                                                                                                                                                                                                                                                                                                                                                                                                                                                                                     |
|---------------------------------|---------------------------------------------------------------------------------------------------------------------------------------------------------------------------------------------------------------------------------------------------------------------------------------------------------------------------------------------------------------------------------------------------------------------------------------------------------------------------------------------------------------------------------------------------------------------------------------------------------------------------------------------------------------------------------------------------------------------------------------------------------------------------------------------------------------------------------------------------------------------------------------------------------------------------------------------------------------------------------------------------------------------------------------------------------------------------------------------------------------------------------------------------------------------|
| Journal:                        | <i>BMJ Open</i>                                                                                                                                                                                                                                                                                                                                                                                                                                                                                                                                                                                                                                                                                                                                                                                                                                                                                                                                                                                                                                                                                                                                                     |
| Manuscript ID                   | bmjopen-2021-059271.R1                                                                                                                                                                                                                                                                                                                                                                                                                                                                                                                                                                                                                                                                                                                                                                                                                                                                                                                                                                                                                                                                                                                                              |
| Article Type:                   | Original research                                                                                                                                                                                                                                                                                                                                                                                                                                                                                                                                                                                                                                                                                                                                                                                                                                                                                                                                                                                                                                                                                                                                                   |
| Date Submitted by the Author:   | 16-Aug-2022                                                                                                                                                                                                                                                                                                                                                                                                                                                                                                                                                                                                                                                                                                                                                                                                                                                                                                                                                                                                                                                                                                                                                         |
| Complete List of Authors:       | Jávor, Péter; University of Szeged, Department of Traumatology<br>Hanák, Lilla; Pécsi Tudományegyetem Általános Orvostudományi Kar<br>Hegyi, Péter; Pécsi Tudományegyetem Általános Orvostudományi Kar,<br>Institute for Translational Medicine<br>Csonka, Endre; Szegedi Tudományegyetem Általános Orvostudományi<br>Kar, Department of Traumatology<br>Butt, Edina; Szegedi Tudományegyetem Általános Orvostudományi Kar,<br>Department of Traumatology<br>Horváth, Tamara; Szegedi Tudományegyetem Általános Orvostudományi<br>Kar<br>Góg, István; Military Hospital, Department of Vascular Surgery<br>Lukacs, Anita; University of Szeged, Department of Public Health<br>Soós, Alexandra; Pécsi Tudományegyetem Általános Orvostudományi<br>Kar<br>Rumbus, Zoltán; Pécsi Tudományegyetem Általános Orvostudományi<br>Kar, Department of Thermophysiology<br>Pákai, Eszter; Pécsi Tudományegyetem Általános Orvostudományi Kar,<br>Department of Thermophysiology<br>Toldi, János; Pécsi Tudományegyetem Általános Orvostudományi Kar,<br>Department of Anesthesiology and Intensive Care<br>Hartmann, Petra; University of Szeged, Department of Traumatology |
| <b>Primary Subject Heading</b>: | Emergency medicine                                                                                                                                                                                                                                                                                                                                                                                                                                                                                                                                                                                                                                                                                                                                                                                                                                                                                                                                                                                                                                                                                                                                                  |
| Secondary Subject Heading:      | Medical education and training                                                                                                                                                                                                                                                                                                                                                                                                                                                                                                                                                                                                                                                                                                                                                                                                                                                                                                                                                                                                                                                                                                                                      |
| Keywords:                       | Trauma management < ORTHOPAEDIC & TRAUMA SURGERY, Bleeding disorders & coagulopathies < HAEMATOLOGY, ORTHOPAEDIC & TRAUMA SURGERY, ACCIDENT & EMERGENCY MEDICINE                                                                                                                                                                                                                                                                                                                                                                                                                                                                                                                                                                                                                                                                                                                                                                                                                                                                                                                                                                                                    |
|                                 |                                                                                                                                                                                                                                                                                                                                                                                                                                                                                                                                                                                                                                                                                                                                                                                                                                                                                                                                                                                                                                                                                                                                                                     |

SCHOLARONE™  
Manuscripts

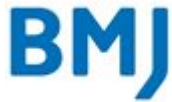

I, the Submitting Author has the right to grant and does grant on behalf of all authors of the Work (as defined in the below author licence), an exclusive licence and/or a non-exclusive licence for contributions from authors who are: i) UK Crown employees; ii) where BMJ has agreed a CC-BY licence shall apply, and/or iii) in accordance with the terms applicable for US Federal Government officers or employees acting as part of their official duties; on a worldwide, perpetual, irrevocable, royalty-free basis to BMJ Publishing Group Ltd ("BMJ") its licensees and where the relevant Journal is co-owned by BMJ to the co-owners of the Journal, to publish the Work in this journal and any other BMJ products and to exploit all rights, as set out in our [licence](#).

The Submitting Author accepts and understands that any supply made under these terms is made by BMJ to the Submitting Author unless you are acting as an employee on behalf of your employer or a postgraduate student of an affiliated institution which is paying any applicable article publishing charge ("APC") for Open Access articles. Where the Submitting Author wishes to make the Work available on an Open Access basis (and intends to pay the relevant APC), the terms of reuse of such Open Access shall be governed by a Creative Commons licence – details of these licences and which [Creative Commons](#) licence will apply to this Work are set out in our licence referred to above.

Other than as permitted in any relevant BMJ Author's Self Archiving Policies, I confirm this Work has not been accepted for publication elsewhere, is not being considered for publication elsewhere and does not duplicate material already published. I confirm all authors consent to publication of this Work and authorise the granting of this licence.

1  
2  
3 1 **THE PREDICTIVE VALUE OF TACHYCARDIA FOR MORTALITY IN TRAUMA-**  
4 **RELATED HEMORRHAGIC SHOCK: A SYSTEMATIC REVIEW AND META-**  
5 2 **REGRESSION**  
6 3  
7  
8  
9

10 4 **Péter Jávor<sup>1</sup>, Lilla Hanák<sup>2</sup>, Péter Hegyi<sup>2;3</sup>, Endre Csonka<sup>1</sup>, Edina Butt<sup>1</sup>, Tamara Horváth<sup>4</sup>, István**  
11 **Góg<sup>5</sup>, Anita Lukács<sup>6</sup>, Alexandra Soós<sup>2</sup>, Zoltán Rumbus<sup>7</sup>, Eszter Pákai<sup>7</sup>, János Toldi<sup>8</sup>, Petra**  
12 **Hartmann<sup>1\*</sup>**  
13 6

14  
15 7 <sup>1</sup> Department of Traumatology, University of Szeged, Szeged, Hungary

16 8 <sup>2</sup> Institute for Translational Medicine, Medical School, University of Pécs, Pécs, Hungary

17 9 <sup>3</sup> Center for Translational Medicine, Department of Medicine, University of Szeged, Szeged, Hungary

18 10 <sup>4</sup> Institute of Surgical Research, University of Szeged, Szeged, Hungary

19 11 <sup>5</sup> Department of Vascular Surgery, Hungarian Defense Forces Medical Center - Military Hospital,  
20 Budapest, Hungary

21 12 <sup>6</sup> Department of Public Health, Faculty of Medicine, University of Szeged, Szeged, Hungary

22 13 <sup>7</sup> Department of Thermophysiology, Medical School, University of Pécs, Pécs, Hungary

23 14 <sup>8</sup> Department of Anesthesiology and Intensive Care, Medical School, University of Pécs, Pécs,  
24 Hungary

25  
26  
27  
28  
29  
30  
31  
32  
33  
34  
35  
36  
37 17 **\*Correspondence**

38 18 Petra Hartmann M.D., Ph.D.

39 19 Semmelweis utca 6., Szeged, 6725 – Hungary

40 20 Tel: +(36-62) 545-531; Fax: +(36-62) 545-530

41 21 E-mail: hartmann.petra@med.u-szeged.hu  
42  
43  
44  
45  
46  
47  
48  
49  
50  
51  
52  
53  
54  
55  
56  
57  
58  
59  
60

22  
23 **Word count** (excluding title page, abstract, references, figures, and tables): 3101

24 **Number of Tables:** 2

25 **Number of Figures:** 4

## 26 ABSTRACT

27 **Objectives:** Heart rate (HR) is one of the physiologic variables in the early assessment of trauma-related  
28 hemorrhagic shock, according to Advanced Trauma Life Support (ATLS). However, its efficiency as  
29 predictor of mortality is contradicted by several studies. Furthermore, the linear association between HR  
30 and the severity of shock and blood loss presented by ATLS is doubtful. This systematic review aims to  
31 update current knowledge on the role of HR in the initial hemodynamic assessment of trauma patients.

32 **Design:** The present study is a systematic review and meta-regression that follows the Preferred  
33 Reporting Items for Systematic Reviews and Meta-Analyses (PRISMA) recommendations.

34 **Data sources:** EMBASE, MEDLINE, CENTRAL and Web of Science databases were systematically  
35 searched through on 1-September-2020.

36 **Eligibility criteria:** Papers providing early HR and mortality data on bleeding trauma patients were  
37 included. Patient cohorts were considered hemorrhagic if the inclusion criteria of the studies contained  
38 transfusion and/or positive focused assessment with sonography for trauma (FAST) and/or post-injury  
39 hemodynamical instability and/or abdominal gunshot injury. Studies on burns, traumatic spinal or- brain  
40 injuries were excluded. Papers published before January 2010 were not considered.

41 **Data extraction and synthesis:** Data extraction and risk of bias were assessed by 2 independent  
42 investigators. The association between HR and mortality of trauma patients was assessed using meta-  
43 regression analysis. As subgroup analysis, meta-regression was performed on patients who received  
44 blood products.

45 **Results:** From a total of 2017 papers, 19 studies met our eligibility criteria. Our primary meta-regression  
46 did not find a significant relation ( $p=0.847$ ) between HR and mortality in trauma patients with  
47 hemorrhage. Our subgroup analysis included 10 studies, and it could not reveal a linear association  
48 between HR and mortality rate.

49 **Conclusions:** In accordance with the literature demonstrating the multi-phasic response of HR to  
50 bleeding, our study presents the lack of linear association between post-injury HR and mortality.  
51 Modifying the pattern of HR-derangements in the ATLS shock classification may result in a more  
52 precise teaching tool for young clinicians.

53 **Keywords:** "tachycardia"; "heart rate"; "hemorrhagic shock"; "multiple trauma"; "ATLS"

## 54 STRENGTHS AND LIMITATIONS OF THIS STUDY

- 55 • The paper provides a systematic search of EMBASE, MEDLINE (via PubMed), Cochrane  
56 Controlled Register of Trials (CENTRAL) and Web of Science databases, utilizes rigorous  
57 study selection criteria, assesses each enrolled paper for bias, and performs meta-regression  
58 analyses.



- 59 • Studies focusing on special populations including pregnant, pediatric (<18 years of age),  
60 geriatric ( $\geq 55$  years), burned and traumatic spinal- or brain injured patients were excluded from  
61 the study.
- 62 • The heterogeneity and the difference in patient number among the included studies prevented  
63 us from performing an adequate meta-analysis.
- 64 • Although mortality is a highly objective outcome, the fact that in some cases hemorrhage might  
65 not been the direct cause of death even if bleeding was present is an important limitation of the  
66 study.

## 67 INTRODUCTION

68 Hypovolemia caused by hemorrhage is the most common cause of shock in trauma. Delay in the  
69 recognition of shock has been linked to unfavorable outcomes such as organ dysfunction and  
70 mortality.[1,2] The initial assessment of trauma-related hypovolemic shock is based on derangements  
71 of physiologic variables according to the recommendations of Advanced Trauma Life Support  
72 (ATLS).[3] Among these variables, heart rate (HR) is one of the most controversial when it comes to  
73 blood loss.[4-7] As commonly criticized, HR is not only influenced by hemodynamic changes, but also  
74 by several other factors such as anxiety, pain, and medications resulting in a low specificity for  
75 hemorrhage.[4,8,9] Furthermore, ATLS suggests the continuously increasing tendency of HR in  
76 accordance with the severity of bleeding.[3] However, in clinical reality, the HR response to hemorrhage  
77 is rather biphasic or triphasic than linear.[8,10,11] Consequently, the utility of HR in the early  
78 management of bleeding trauma patients was called into doubt during the past decades.[4,5,8,9]

79 The reliability of HR was already questioned in the early 2000s by a retrospective analysis on 14325  
80 trauma patients. According to the results of this study, HR displayed insufficient sensitivity and  
81 specificity in predicting hypotension after trauma.[9] A few years later, a registry analysis denoted  
82 further doubts in HR, as it had performed poorly in predicting the need for an emergent intervention and  
83 administration of packed red blood cells (pRBC) in the first 24 hours post-injury.[4] Additionally, as  
84 ATLS was progressively widespread, the role of HR in the classification of hypovolemic shock sparked  
85 controversy. In 2013, 16305 patients from the German trauma register (DGU®) were allocated into  
86 shock severity classes (I-IV) according to ATLS guidance.[12] Ultimately, no group displayed relevant  
87 tachycardia at all. According to these data, expecting tachycardia in case of hypovolemia can be  
88 misleading in many instances. Moreover, a false sense of hemodynamic stability based on normal HR  
89 can lead to fatal consequences, since the lack of tachycardia in hypoperfusion is associated with poor  
90 prognosis.[13]

91 Despite criticism, increased HR has been known as a characteristic of hypovolemic shock for a very  
92 long time. The utility of HR as a predictor of mortality is supported by several papers.[14,15] An  
93 international, cross-sectional study using data from two large trauma cohorts was conducted to develop

1  
2  
3 94 and validate a prognostic model to predict death due to bleeding. Although HR showed a significant  
4 95 relation to mortality, the curve was U-shaped as opposed to the linear model presented by ATLS.[15]  
5  
6 96 A notable limitation of previous studies is that trauma protocols have undergone several changes, which  
7  
8 97 makes recent information incomparable with data from the past. In 2010, the CRASH-2 trial brought  
9  
10 98 one of the most prominent findings of the past decades with the validation of the safeness and effectivity  
11 99 of tranexamic acid (TXA).[16-18]  
12  
13 100 The present systematic review investigates the role of HR in the initial assessment of trauma patients  
14 101 with hemorrhage. Regarding the efficiency of HR as a predictor of outcome in trauma, there is  
15 102 contradictory data in the literature.[4,5,15] Furthermore, the linear association between HR and blood  
16 103 loss presented by ATLS is questionable.[8,15] Due to the development of trauma care and a paradigm  
17 104 shift in the initial fluid resuscitation approach in the past decades,[16,19] we aimed to update current  
18 105 knowledge on the effectivity of HR as predictor of mortality post-injury. For this purpose, a  
19 106 comprehensive database search has been conducted, data has been extracted and analyzed through meta-  
20 107 regressions. As a primary outcome, the relationship between HR and mortality has been assessed. Since  
21 108 the severity of bleeding has a close relation to the risk for adverse outcomes including increased organ  
22 109 dysfunction and mortality, our study may be able to initiate further research reappraising the validity of  
23 110 HR in the ATLS classification of hypovolemic shock.

## 111 **MATERIALS AND METHODS**

### 112 **Protocol and search strategy**

113 The present review is reported in accordance with Preferred Reporting Items for Systematic Reviews  
114 and Meta-Analyses (PRISMA).[20] The PRISMA checklist for our work is available in the supporting  
115 information (Table S1). The review protocol was registered in the Open Science Framework (OSF)  
116 system under registration DOI: 10.17605/OSF.IO/HJWYR.

117 A systematic search of EMBASE, MEDLINE (via PubMed), Cochrane Controlled Register of Trials  
118 (CENTRAL) and Web of Science databases was performed on 1 September 2020 with the following  
119 search terms: "trauma" AND ("heart rate" OR "pulse rate" OR "tachycardia" OR "bradycardia" OR "vital  
120 sign" OR "vital signs" OR "vital parameter" OR "vital parameters") AND "mortality" AND ("bleeding"  
121 OR "haemorrhage" OR "hemorrhage" OR "haemodynamic" OR "hemodynamic"). Articles published  
122 before 2010 were excluded from our study.

### 123 **Eligibility criteria**

124 Records on bleeding trauma patients were considered for eligibility only if they provided initial HR  
125 values (prehospital (PH) or upon admission (AD)) in addition to mortality data covering a time interval  
126 not exceeding 30 days from the time of injury. Only full-text articles were considered. Non-English  
127 language reports, reviews, conference abstracts and case reports with low patient number (<10) were  
128 excluded. Taking the development of trauma care in the past decade into consideration (e.g.: introduction

1  
2  
3 129 of TXA,[16] and paradigm shift in fluid resuscitation [19]) all studies that included data on patients  
4 130 treated before 2010 were also excluded.

6  
7 131 To consider a patient cohort hemorrhagic, the inclusion criteria of the individual studies had to include  
8 132 transfusion of blood products and/or positive focused assessment with sonography for trauma (FAST)  
9 133 examination and/or hemodynamical instability after trauma and/or abdominal gunshot injury. Records  
10 134 on special populations such as pregnant, pediatric (<18 years of age) or geriatric ( $\geq 55$  years) were not  
11 135 considered. Studies on patients suffering burns, traumatic spinal or- brain injuries were excluded.

12 136 With excluding special populations and pediatric and older age groups we aimed to reduce the influence  
13 137 of confounding factors. Since studies of geriatric trauma patients have used age cutoffs ranging from 55  
14 138 to 80 years and there is no clear consensus in the literature,[21,22] we decided to exclude study  
15 139 populations of 55 years of age or older to diminish the effects of age-related confounding factors.

#### 21 140 **Study selection**

22 141 After having duplicates removed with the help of a reference manager software (EndNote X7), articles  
23 142 published before 2010 were also discarded. On the remaining studies, title and abstract screenings were  
24 143 performed by two review authors (PJ, IG). Thereafter, the full texts of the potentially eligible records  
25 144 were obtained and assessed based on the criteria described above. Disagreements were resolved by  
26 145 consensus.

#### 31 146 **Data extraction**

32 147 The following information was extracted from the eligible studies: title, first author's name, year of  
33 148 publication, study design, data origin (country, hospital database/registry), data collection period,  
34 149 inclusion criteria, subgroups, patient number of the subgroups, total patient number, HR (mean  $\pm$   
35 150 standard deviation (SD) or median [interquartile range] (IQR)), phase of recording HR values (PH/AD),  
36 151 mortality within 30 days (n, %). In case of studies using overlapping data, the less comprehensive report  
37 152 with the smaller sample size was excluded.

#### 43 153 **Risk of bias assessment**

44 154 Quality In Prognostic Studies (QUIPS) tool was used separately by two authors (TH and ZR) to assess  
45 155 the risk of bias for each study.[23] Disagreements were resolved by consensus. QUIPS consists of six  
46 156 main domains: 'Study attrition', 'Study participation', 'Prognostic factor', 'Outcome measurement',  
47 157 'Study confounding' and 'Statistical analysis and reporting'. A rating for each domain was assigned as  
48 158 carrying 'low', 'moderate' or 'high' risk of bias. Based on the ratings of the individual domains, the  
49 159 overall risk of bias was evaluated by each study.

#### 55 160 **Statistical analysis**

56 161 The association between HR and mortality of trauma patients was assessed using meta-regression  
57 162 analysis. A result of  $p < 0.05$  was considered as significant. As a subgroup analysis, meta-regression was  
58 163 performed on trauma patients who received blood products. Statistical analyses were performed with

1  
2  
3 164 Stata 16 (Stata Corp, College Station, TX, USA). To convert median values to means, we used the  
4 165 method of Xiang Wan.[24]  
5  
6  
7

## 8 166 **Patient and public involvement**

9 167 Patients and public were not specifically involved in designing the study.  
10  
11  
12

## 13 168 **RESULTS**

### 14 169 **Results of systematic search and selection**

15 170 Two thousand and seventeen records were identified through our search strategy on 1 September 2020.  
16 171 One thousand three hundred seventy-three articles were screened on title. Five hundred fifty-seven  
17 172 abstracts were assessed, and 132 publications were enrolled into the final, comprehensive full text  
18 173 analysis. Ultimately, 19 records met our eligibility criteria. The flowchart of study enrollment is shown  
19 174 in Figure 1.  
20  
21  
22  
23  
24

25 175 **Fig. 1.** PRISMA flow diagram  
26  
27

### 28 176 **Study characteristics**

29 177 All publications processed data of trauma patients with suspected hemorrhage from the past 10 years.  
30 178 From 19 studies yielding 3057 patients in total, 13 records collected data retrospectively and 6  
31 179 prospectively. The number of participants in each dataset ranged from 15 to 428. Ten studies enrolled  
32 180 patients only if they received blood products as a part of the initial management. Seven publications  
33 181 used hemodynamic instability identified mainly by vital parameters as inclusion criteria. One study  
34 182 analyzed patients with a positive result on FAST examination after blunt abdominal trauma. One  
35 183 research enrolled patients with abdominal gunshot injuries. Each of the inclusion criteria listed above  
36 184 entails a strong suspicion for significant bleeding. The main characteristics of the 19 eligible studies are  
37 185 summarized in Table 1. The more comprehensive description of the papers is available in the  
38 186 supplementary material (Table S2).  
39  
40  
41  
42  
43  
44  
45

| 46 47 <b>First author, year</b> | 48 <b>Country</b>        | 49 <b>Data collection</b> | 50 <b>Patient characteristics</b> | 51 <b>Patient number</b> | 52 <b>HR mean ± SD (PH/AD)</b> | 53 <b>Mortality n, (%)</b> |
|---------------------------------|--------------------------|---------------------------|-----------------------------------|--------------------------|--------------------------------|----------------------------|
| 54 <i>Bohonek 2019 [25]</i>     | 55 <i>Czech Republic</i> | 56 <i>retrospective</i>   | 57 <i>received blood products</i> | 58 46                    | 59 $94.8 \pm 59.0$ (AD)        | 60 10 (21.7)               |
| <i>Boudreau 2019 [26]</i>       | USA                      | retrospective             | received blood products           | 116                      | $101.3 \pm 43.0$ (PH)          | 27 (23.3)                  |
| Duchesne 2019 [27]              | USA                      | retrospective             | hemodynamic instability           | 279                      | $120.6 \pm 27.7$ (AD)          | 89 (32.0)                  |
| Montazer 2019 [28]              | Iran                     | prospective               | hemodynamic instability           | 400                      | $110.0 \pm 14.0$ (AD)          | 67 (16.7)                  |
| <i>Priestley 2019 [29]</i>      | USA                      | retrospective             | received blood products           | 283                      | $104.0 \pm 24.0$ (PH)          | 88 (31.1)                  |

|                               |                  |                      |                                           |     |                   |            |
|-------------------------------|------------------|----------------------|-------------------------------------------|-----|-------------------|------------|
| <i>Barmparas 2018 [30]</i>    | <i>USA</i>       | <i>retrospective</i> | <i>received blood products</i>            | 120 | 101.1 ± 39.7 (AD) | 59 (49.2)  |
| <i>Chaochan kit 2018 [31]</i> | <i>Thailand</i>  | <i>retrospective</i> | <i>received blood products</i>            | 15  | 113.0 ± 22.1 (AD) | 12 (80.0)  |
| Moore 2018 [32]               | USA              | prospective          | hemodynamic instability                   | 125 | 110.0 ± 15.9 (PH) | 16 (12.8)  |
| Ng 2018 [33]                  | Canada           | retrospective        | hemodynamic instability                   | 117 | 112.0 ± 35.0 (AD) | 22 (19.0)  |
| Guo 2017 [34]                 | China            | prospective          | hemodynamic instability                   | 428 | 111.3 ± 17.9 (AD) | 104 (23.4) |
| Heidari 2017 [35]             | Iran             | prospective          | blunt abdominal trauma with positive FAST | 168 | 105.3 ± 23.4 (AD) | 57 (33.9)  |
| <i>Luehr 2017 [36]</i>        | <i>USA</i>       | <i>retrospective</i> | <i>received blood products</i>            | 115 | 133.3 ± 21.4 (PH) | 20 (17.4)  |
| <i>Naumann 2017 [37]</i>      | <i>UK</i>        | <i>retrospective</i> | <i>received blood products</i>            | 17  | 108.0 ± 16.2 (AD) | 3 (17.6)   |
| <i>Savage 2017 [38]</i>       | <i>USA</i>       | <i>retrospective</i> | <i>received blood products</i>            | 330 | 108.2 ± 55.3 (AD) | 82 (24.8)  |
| <i>Day 2016 [39]</i>          | <i>USA</i>       | <i>retrospective</i> | <i>received blood products</i>            | 116 | 98.0 ± 24.0 (PH)  | 13 (11.0)  |
| Ordoñez 2016 [40]             | Colombia         | retrospective        | hemodynamic instability                   | 171 | 112.6 ± 23.5 (AD) | 26 (15.2)  |
| Shah 2015 [41]                | Pakistan         | retrospective        | isolated abdominal gunshot wound          | 70  | 99.8 ± 30.3 (AD)  | 11 (15.7)  |
| Thurston 2015 [42]            | South Africa     | prospective          | hemodynamic instability                   | 50  | 123.3 ± 13.1 (AD) | 11 (22.0)  |
| <i>Sisak 2013 [43]</i>        | <i>Australia</i> | <i>prospective</i>   | <i>received blood products</i>            | 91  | 100.0 ± 30.1 (AD) | 13 (14.0)  |

**Table 1.** Baseline characteristics of the included studies. The majority of the papers enrolled trauma patients who received blood products (italics) and/or showed signs of hemodynamic instability. Hemodynamic instability was defined by vital parameters in most cases. Most of the data was collected retrospectively. The number of participants in each dataset ranged from 15 to 428. There was a significant heterogeneity in mortality between datasets. The need for massive transfusion was accompanied by a prominently high mortality rate. A mean heart rate (HR) > 120 bpm did not entail an outstanding mortality rate.

\*only cohort B consisted of trauma patients with active bleeding

PH=prehospital, AD=upon admission, FAST=focused assessment with sonography for trauma

### 196 Study quality

197 The methodological quality of the enrolled papers was investigated with QUIPS tool. The domain ‘Study attrition’ was not suitable for the retrospective studies. In 5 prospective studies, a moderate risk for study attrition bias was identified. All papers were judged to carry a low risk of bias in ‘Study participation’ and ‘Prognostic factor measurement’ domains. In contrast, almost half of the records were accompanied by a moderate risk of bias with regards to ‘Study confounding’, since the role of important confounders was not clarified in these reports. The results of the QUIPS assessment are shown in Figure 2.

### 203 Fig. 2 Risk of bias assessment

### 204 Primary meta-regression

Our primary meta-regression investigated the relation between HR and mortality in trauma patients with hemorrhage based on all 19 datasets. We found no significant relation between HR and the outcome ( $p=0.847$ ); thus, a linear association could not be confirmed. The results with the regression line are demonstrated in Figure 3.

**Fig. 3** Relation between HR and mortality of bleeding trauma patients

### Subgroup analysis

Due to the relative heterogeneity of the patient enrollment criteria of the individual papers, a subgroup of 10 studies utilizing the use of blood products in the initial management as inclusion criteria was formed and analyzed separately. Again, our findings demonstrated no significant relation and linear association between HR and mortality rate (Fig. 4).

**Fig. 4** Subgroup analysis of studies on trauma patients who received blood products

## DISCUSSION

### Interpretation of results

The present study was designed to investigate and update current knowledge on the relation between HR and mortality in bleeding trauma patients. We identified 19 studies providing early HR and mortality data on trauma patients with hemorrhage from the past 10 years through database search. Due to the relative heterogeneity of the patient enrollment criteria of the individual papers, a subgroup of 10 records was created. Each of these 10 studies provided data on trauma patients who received blood products. Meta regressions were conducted on the data of all records and the subgroup, respectively.

No significant relation was found between HR and mortality in our meta regressions. This result supports the evidence provided by studies doubting the value of HR in the initial assessment of potentially bleeding trauma patients. Additionally, our findings raise further concerns over the validity of HR in the ATLS classification of hypovolemic shock.

HR is an easily accessible vital parameter that indubitably reacts to circulatory volume depletion [5,6]. However, the complexity of this reaction seems to contain too many possibilities for misinterpretation to be used in the simplified scheme presented by ATLS. The current classification of hypovolemic shock suggests that HR increases continuously parallel to the severity of bleeding. The increase can stagnate between class I-II and III-IV according to ATLS.[3] This scheme seems to be incongruent with the existing literature on the physiology of HR change during intravascular volume depletion. The HR response tends to follow a biphasic or triphasic pattern instead of continuous increase [8,10,11]. If it comes to a decrease or stagnation in HR value, it is likely to occur at two separate stages of hemorrhage. First, due to increased vagal activity caused by a Bezold-Jarisch-like reflex just around 30% blood loss,[5,10] between shock classes II and III, where ATLS suggests a clear increase in HR. Secondly, at the end stage of hemorrhage, bradycardia appears preceding cardiac arrest.[15,44,45] Based on these

239 observations, the pattern of HR alterations during hemorrhage suggested by ATLS may reflect the  
240 clinical condition more accurately after minor modifications (Table 2).

| <i>Severity classes</i>      |                  | <i>Class I</i> | <i>Class II</i> | <i>Class III</i> | <i>Class IV</i>     |
|------------------------------|------------------|----------------|-----------------|------------------|---------------------|
| <i>Estimated blood loss</i>  |                  | <15%           | 15-30%          | 31-40%           | >40%                |
| <i>Physiologic variables</i> | HR               | ↔              | ↔/↑             | ↑                | ↑/↑↑                |
|                              | <b>HR*</b>       | ↔              | ↑               | ↔/↑              | ↓/↑                 |
|                              | SBP              | ↔              | ↔               | ↔/↓              | ↓                   |
|                              | GCS              | ↔              | ↔               | ↓                | ↓                   |
|                              | Pulse pressure   | ↔              | ↓               | ↓                | ↓                   |
|                              | Respiratory rate | ↔              | ↔               | ↑                | ↑                   |
|                              | Urine output     | ↔              | ↔               | ↓                | ↓↓                  |
|                              | BD               | 0-2 mEq        | 2-6 mEq         | 6-10 mEq         | ≥10 mEq             |
| Transfusion                  |                  | Monitor        | Possible        | Yes              | Massive transfusion |

241 **Table 2.** Advanced Trauma Life Support (ATLS) classification of hypovolemic shock including  
242 suggested modifications in the pattern of heart rate (HR) derangements. The table is based on the 10th  
243 edition of ATLS. Estimated blood loss is shown as percentage of total blood volume.

244 \*The suggested modifications are highlighted in bold: possible stagnation in HR value is indicated  
245 around 30% blood loss due to increased vagal activity. The possibility of bradycardia in profound  
246 bleeding in Class IV is highlighted

247 HR=heart rate, SBP=systolic blood pressure, GCS=Glasgow Coma Scale, BD=base deficit

248 Despite criticism, HR is a promptly available vital sign that may lead physicians in the right direction in  
249 a relatively high percentage of cases when it comes to the initial management of potentially bleeding  
250 trauma patients. However, the question remains if it is effective enough to be taken into consideration  
251 when we can also rely on parameters with higher sensitivity and specificity for bleeding – such as base  
252 deficit. Multiple studies have presented the inferiority of HR as compared to other predictors included  
253 in the ATLS criteria such as systolic blood pressure (SBP), Glasgow Coma Scale (GCS) and base deficit  
254 (BD).[46,47] Based on these concerns, the role of HR in the classification of hypovolemic shock and  
255 the initial management of the severely injured should be re-evaluated.

### 256 **Strengths and limitations**

257 Our study focuses on injury-related severe hemorrhage, a condition carrying high clinical importance.  
258 In the previous decades, trauma care has gone through remarkable development. On that note, we  
259 decided to use scientific data only from January 2010 – September 2020 (date of database search). The  
260 included papers were judged to carry a relatively low risk of bias.

261 Naturally, our study also has its limitations. Although mortality is a highly objective outcome and we  
262 included patients only with significant hemorrhage, the direct cause of death may be difficult to  
263 determine in some cases. Although studies on special populations have been excluded from our analysis,

1  
2  
3 264 it is important to emphasize that the presence of potential confounding factors affecting HR values could  
4 265 not be ruled out completely. Prehospital measures may have affected the HR values registered upon  
5 266 admission. There is a notable difference in patient number among some of the included studies. The  
6 267 characteristics of the patient population by the individual records show a significant heterogeneity. To  
7 268 minimize this, a subgroup analysis was performed on patients who received blood products during initial  
8 269 in-hospital trauma care. These limitations prevented us from performing an adequate meta-analysis;  
9 270 however, we believe that we managed to raise attention on a clinically important issue.

## 15 271 **Conclusions**

16 272 The legitimacy of HR in the initial assessment of hypovolemic shock seems to be obvious, but in fact, its  
17 273 usefulness is questionable due to unsatisfactory sensitivity and specificity. The complexity of HR  
18 274 response during hemorrhage leads to the possibility of misinterpretation, false sense of hemodynamic  
19 275 stability and consequent delay in adequate therapy.

20 276 Further research is required to reappraise HR as a physiologic variable in the ATLS classification of  
21 277 hypovolemic shock. As a reaction frequently associated with bleeding, tachycardia should raise  
22 278 suspicion for hemorrhage, but it might not be appropriate as one of the determining factors of therapeutic  
23 279 decisions, such as administration of blood products. In addition to the literature demonstrating the multi-  
24 280 phasic response of HR to bleeding, our study presents the lack of linear association with mortality.  
25 281 Considering these, modifying the pattern of HR derangements in the ATLS shock classification may  
26 282 make this pragmatic guide even more precise.

## 36 283 **LIST OF ABBREVIATIONS**

37  
38 284 CENTRAL - Cochrane Controlled Register of Trials  
39  
40 285 ATLS - Advanced Trauma Life Support  
41  
42 286 HR - heart rate  
43  
44 287 pRBC - packed red blood cells  
45  
46 288 TXA - tranexamic acid  
47  
48 289 PRISMA - Preferred Reporting Items for Systematic Reviews and Meta-Analyses  
49  
50 290 PH - prehospital  
51  
52 291 AD - on admission  
53  
54 292 FAST - focused assessment with sonography for trauma  
55  
56 293 SD - standard deviation  
57  
58 294 IQR - interquartile range  
59  
60 295 QUIPS - Quality In Prognostic Studies  
61  
62 296 SBP- systolic blood pressure  
63  
64 297 GCS - Glasgow Coma Scale



1  
2  
3 298 BD - base deficit  
4  
5

6  
7 299 **STATEMENTS**  
8

9 300 **Conflict of Interests**

10 301 The authors declare that the research was conducted in the absence of any commercial or financial  
11 302 relationships that could be construed as a potential conflict of interest.

13  
14 303 **Funding**

15  
16 304 The study was funded by the following National Research Development and Innovation Office grants:  
17 305 FK138839; EFOP- 3.6.3-VEKOP-16-2017-00009. PHa was further supported by the Bolyai János Grant  
18 306 of the Hungarian Science Academy: BO/00605/21/5. Funders did not influence the design and scientific  
19 307 content of our paper in any way.

22  
23 308 **Authors' contributions**

24 309 PJ: preparation of the draft of the manuscript, contribution in study design, selection of studies, data  
25 310 extraction; LH: statistical analysis, interpretation of data; PHe: expert in the field of internal medicine,  
26 311 provided revisions to the scientific content of the manuscript; EC: expert in the field of traumatology,  
27 312 substantial contribution in study design and interpretation of data, provided revisions to the scientific  
28 313 content of the manuscript; EB: data extraction, preparation of the standardized data collection sheet; TH:  
29 314 risk of bias assessment, stylistic and grammatical revision of the manuscript; IG: substantial contribution  
30 315 in study design, selection of studies, data extraction; AL: formatting the manuscript, stylistic revision of  
31 316 the manuscript; AS: statistical analysis, interpretation of data; ZR: risk of bias assessment, preparation  
32 317 of the manuscript; EP: participation in the design of the study and its coordination; JT: provided revisions  
33 318 to the scientific content of the manuscript, validation of data extraction; PHa: study design, preparation  
34 319 of the manuscript, provided revisions to the scientific content of the manuscript  
35 320 Hereby, all authors certify that they have participated sufficiently in the work to take public  
36 321 responsibility for the content.

37  
38  
39  
40  
41  
42  
43  
44  
45 322 **Ethics approval and consent to participate**

46 323 Not applicable.

47  
48  
49 324 **Consent for publication**

50 325 Not applicable.

51  
52  
53 326 **Availability of data and materials**

54 327 Our study uses published data only. The original contributions presented in the study are included in the  
55 328 article and supplementary material, further inquiries can be directed to the corresponding author.

56  
57  
58 329 **Acknowledgements**

59 330 There are no acknowledgements in association with the present study.  
60

331 **REFERENCES**

- 332 1. Mutschler M, Paffrath T, Wöfl C, Probst C, Nienaber U, Schipper IB, et al. The ATLS(®)  
333 classification of hypovolaemic shock: a well established teaching tool on the edge? *Injury*. (2014) 3:S35-  
334 8. doi: 10.1016/j.injury.2014.08.015.
- 335 2. Evans JA, van Wessem KJ, McDougall D, Lee KA, Lyons T, Balogh ZJ. Epidemiology of traumatic  
336 deaths: comprehensive population-based assessment. *World J Surg*. (2010) 34:158-63.  
337 <https://doi.org/10.1007/s00268-009-0266-1>
- 338 3. Henry S, Brasel K, Stewart RM, American College of Surgeons. "Shock". In: Henry S, Brasel K,  
339 Stewart RM, editors. *Advanced trauma life support: student course manual*. Chicago, IL (2018). p. 42-  
340 61.
- 341 4. Brasel KJ, Guse C, Gentilello LM, Nirula R. Heart rate: is it truly a vital sign? *J Trauma* (2007)  
342 62:812-7. doi: 10.1097/TA.0b013e31803245a1
- 343 5. Secher NH and Van Lieshout JJ. Heart rate during haemorrhage: time for reappraisal. *J Physiol* (2010)  
344 588:19. doi: 10.1113/jphysiol.2009.184499
- 345 6. Guyton AC. *Textbook of Medical Physiology*. Philadelphia (1986). 332-43 p.
- 346 7. Braunwald E, Williams GH. "Alterations in arterial pressure and the shock syndrome". In: Jameson  
347 JL, editor. *Harrison's principles of internal medicine*. (1987). p. 153-6.
- 348 8. Guly HR, Bouamra O, Spiers M, Dark P, Coats T, Lecky FE. Vital signs and estimated blood loss in  
349 patients with major trauma: testing the validity of the ATLS classification of hypovolaemic shock.  
350 *Resuscitation*. (2011) 82:556-9. doi: 10.1016/j.resuscitation.2011.01.013.
- 351 9. Victorino GP, Battistella FD, Wisner DH. Does tachycardia correlate with hypotension after trauma?  
352 *J Am Coll Surg* (2003) 196:679-84. doi: 10.1016/S1072-7515(03)00128-5
- 353 10. Jacobsen J and Secher NH. Heart rate during haemorrhagic shock. *Clin Physiol* (1992) 12:659-66.  
354 doi: 10.1111/j.1475-097x.1992.tb00369.x
- 355 11. Little RA, Kirkman E, Driscoll P, Hanson J, Mackway-Joneset K. Preventable deaths after injury:  
356 why are the traditional 'vital' signs poor indicators of blood loss? *Journal of accident & emergency*  
357 *medicine* (1995) 12:1-14. doi: 10.1136/emj.12.1.1
- 358 12. Mutschler M, Nienaber U, Brockamp T, Wafaisade A, Fabian T, Paffrath T, et al. Renaissance of  
359 base deficit for the initial assessment of trauma patients: a base deficit-based classification for  
360 hypovolemic shock developed on data from 16,305 patients derived from the TraumaRegister DGU®.  
361 *Crit Care* (2013) 17:R42. doi: 10.1186/cc12555.

- 1  
2  
3 362 13. Mizushima Y, Ueno M, Watanabe H, Ishikawa K, Matsuoka T. Discrepancy between heart rate and  
4 363 makers of hypoperfusion is a predictor of mortality in trauma patients. *J Trauma*. (2011) 71:789-92. doi:  
5 364 10.1097/TA.0b013e31822f7bbd0020  
6  
7  
8 365 14. Ley EJ, Singer MB, Clond MA, Ley HC, Mirocha J, Bukur M, et al. Admission heart rate is a  
9 366 predictor of mortality. *J Trauma Acute Care Surg*. (2012) 72:943-47. doi:  
10 367 10.1097/TA.0b013e3182465527  
11  
12  
13 368 15. Ageron FX, Gayet-Ageron A, Steyeberg E, Bouzat P, Roberts Ian. Prognostic model for traumatic  
14 369 death due to bleeding: cross-sectional international study. *BMJ Open* (2019) 9:e2044-6055. doi:  
15 370 10.1136/bmjopen-2018-026823  
16  
17 371 16. Shakur H, Roberts I, Bautista R, Caballero J, Coats T, Dewanet Y, et al. Effects of tranexamic acid  
18 372 on death, vascular occlusive events, and blood transfusion in trauma patients with significant  
19 373 haemorrhage (CRASH-2): a randomised, placebo-controlled trial. *Lancet* (2010) 376:23-32. doi:  
20 374 10.1016/S0140-6736(10)60835-5  
21  
22 375 17. Boling B, Moore K. Tranexamic acid (TXA) use in trauma. *J Emerg Nurs* (2012) 38:496-7. doi:  
23 376 10.1016/j.jen.2012.06.001  
24  
25 377 18. Cole E, Davenport R, Willett K, Brohi K. Tranexamic acid use in severely injured civilian patients  
26 378 and the effects on outcomes: a prospective cohort study. *Ann Surg*. (2015) 261:390-4. doi:  
27 379 10.1097/SLA.0000000000000717  
28  
29 380 19. Kutcher ME, Kornblith LZ, Narayan R, Curd V, Daley AT, Redick BJ, et al. A paradigm shift in  
30 381 trauma resuscitation: evaluation of evolving massive transfusion practices. *JAMA Surg*. (2013) 148:834-  
31 382 40. doi: 10.1001/jamasurg.2013.2911  
32  
33 383 20. Moher D, Shamseer L, Clarke M, Ghersi D, Liberati A, Petticrew M, et al. Preferred reporting items  
34 384 for systematic review and meta-analysis protocols (PRISMA-P) 2015 statement. *Syst Rev* (2015) 4:1.  
35 385 doi: 10.1186/2046-4053-4-1  
36  
37 386 21. McGwin Jr G, MacLennan PA, Fife JB, Davis GG, Rue LW. Preexisting conditions and mortality  
38 387 in older trauma patients. *J Trauma* (2004) 56:1291-6. doi: 10.1097/01.ta.0000089354.02065.d0  
39  
40 388 22. Meldon SW, Reilly M, Drew BL, Manusco C., Fallon W. Trauma in the very elderly: a  
41 389 community-based study of outcomes at trauma and nontrauma centers. *J Trauma* (2002) 52:79-84. doi:  
42 390 10.1097/00005373-200201000-00014  
43  
44 391 23. Hayden JA, van der Windt DA, Cartwright JL, Côté P, Bombardier C. Assessing bias in studies of  
45 392 prognostic factors. *Ann Intern Med*. (2013) 158:280-6. doi: 10.7326/0003-4819-158-4-201302190-  
46 393 00009  
47  
48  
49  
50  
51  
52  
53  
54  
55  
56  
57  
58  
59  
60

- 1  
2  
3 394 24. Wan X, Wang W, Liu J, Tong T. Estimating the sample mean and standard deviation from the sample  
4 395 size, median, range and/or interquartile range. *BMC Med Res Methodol* (2014) 14:135. doi:  
5 396 10.1186/1471-2288-14-135  
6  
7  
8 397 25. Bohonek M, Kutac D, Landova L, Koranova M, Sladkova E, Staskova E, et al. The use of  
9 398 cryopreserved platelets in the treatment of polytraumatic patients and patients with massive bleeding.  
10 399 *Transfusion* (2019) 59:1474-78. doi: 10.1111/trf.15177  
11  
12  
13 400 26. Boudreau RM, Deshpande KK, Day GM, Hinckley WR, Harger N, Pritts TA, et al. Prehospital  
14 401 Tranexamic Acid Administration During Aeromedical Transport After Injury. *J Surg Res* (2019)  
15 402 233:132-38. doi: 10.1016/j.jss.2018.07.074  
16  
17  
18 403 27. Duchesne J, Costantini TW, Khan M, Taub E, Rhee P, Morse B, et al. The effect of hemorrhage  
19 404 control adjuncts on outcome in severe pelvic fracture: A multi-institutional study. *J Trauma Acute Care*  
20 405 *Surg* (2019) 87:117-24. doi: 10.1097/TA.0000000000002316  
21  
22  
23 406 28. Montazer SH, Jahanian F, Khatir IG, Bozorgi F, Assadi T, Pashaei SM, et al. Prognostic Value of  
24 407 Cardiac Troponin I and T on Admission in Mortality of Multiple Trauma Patients Admitted to the  
25 408 Emergency Department: a Prospective Follow-up Study. *Med Arch* (2019) 73:11-14. doi:  
26 409 10.5455/medarh.2019.73.11-14  
27  
28  
29 410 29. Priestley EM, Inaba K, Byerly S, Biswas S, Wong MD, Lam L, et al. Pulse Pressure as an Early  
30 411 Warning of Hemorrhage in Trauma Patients. *J Am Coll Surg* (2019) 229(2):184-191. doi:  
31 412 10.1016/j.jamcollsurg.2019.03.021  
32  
33  
34 413 30. Barmparas G, Dhillon NK, Smith EJ, Mason R, Melo N, Thomsen GM, et al. Patterns of vasopressor  
35 414 utilization during the resuscitation of massively transfused trauma patients. *Injury* (2018) 49:8-14. doi:  
36 415 10.1016/j.injury.2017.09.021  
37  
38  
39 416 31. Chaochankit W, Akaraborworn O, Sangthong B, Thongkhao K. Combination of blood lactate level  
40 417 with assessment of blood consumption (ABC) scoring system: A more accurate predictor of massive  
41 418 transfusion requirement. *Chin J Traumatol.* (2018) 21:96-9. doi: 10.1016/j.cjte.2017.12.003  
42  
43  
44 419 32. Moore HB, Moore EE, Chapman MP, McVaney K, Bryskiewicz G, Blechar R, et al. Plasma-first  
45 420 resuscitation to treat haemorrhagic shock during emergency ground transportation in an urban area: a  
46 421 randomised trial. *Lancet* (2018) 392:283-91. doi: 10.1016/S0140-6736(18)31553-8  
47  
48  
49 422 33. Ng M, Perrott J, Burgess S. Evaluation of tranexamic acid in trauma patients: A retrospective  
50 423 quantitative analysis. *Am J Emerg Med.* (2019) 37:444-9. doi: 10.1016/j.ajem.2018.06.010  
51  
52  
53 424 34. Guo SB, Chen YX, Yu XZ. Clinical Characteristics and Current Interventions in Shock Patients in  
54 425 Chinese Emergency Departments: A Multicenter Prospective Cohort Study. *Chin Med J* (2017)  
55 426 130:1146-54. doi: 10.4103/0366-6999.205862

- 1  
2  
3 427 35. Heidari K, Taghizadeh M, Mahmoudi S, Panahi H, Shad EG, Asadollahi S. FAST for blunt  
4 428 abdominal trauma: Correlation between positive findings and admission acid-base measurement. *Am J*  
5 429 *Emerg Med* (2017) 35:823-9. doi: 10.1016/j.ajem.2017.01.035  
6  
7  
8 430 36. Luehr E, Grone G, Pathak M, Austin C, Thompson S. Administration of tranexamic acid in trauma  
9 431 patients under stricter inclusion criteria increases the treatment window for stabilization from 24 to 48  
10 432 hours-a retrospective review. *Int J Burns Trauma* (2017) 7:115-9  
11  
12  
13 433 37. Naumann DN, Hazeldine J, Dinsdale RJ, Bishop JR, Midwinter MJ, Harrison P, et al.  
14 434 Endotheliopathy is associated with higher levels of cell-free DNA following major trauma: A  
15 435 prospective observational study. *PLoS One* (2017) 12:e0189870. doi: 10.1371/journal.pone.0189870  
16  
17  
18 436 38. Savage SA, Zarzaur BL, Brewer BL, Lim GH, Martin AC, Magnotti LJ, et al. 1: 1 Transfusion  
19 437 strategies are right for the wrong reasons. *J Trauma Acute Care Surg* (2017) 82:845-52. doi:  
20 438 10.1097/TA.0000000000001402  
21  
22  
23 439 39. Day DL, Anzelon KM, Conde FA. Association of Prehospital Shock Index and Trauma Bay  
24 440 Uncrossmatched Red Blood Cell Transfusion With Multiple Transfusion. *J Trauma Nurs* (2016) 23:89-  
25 441 95. doi: 10.1097/JTN.0000000000000192  
26  
27  
28 442 40. Ordonez CA, Herrera-Escobar JP, Parra MW, Rodriguez-Ossa PA, Mejia DA, Sanchez AI, et al.  
29 443 Computed tomography in hemodynamically unstable severely injured blunt and penetrating trauma  
30 444 patients. *J Trauma Acute Care Surg* (2016) 80:597-602. doi: 10.1097/TA.0000000000000975  
31  
32  
33 445 41. Shah AA, Rehman A, Shah SJ, Haider AH, Zogg CH, Zafar SN, et al. Abdominal gunshot wounds-a  
34 446 comparative assessment of severity measures. *J Surg Res* (2015) 198:334-9. doi:  
35 447 10.1016/j.jss.2015.03.061  
36  
37  
38 448 42. Thurston B, Chowdhury S, Edu S, Nicol AJ, Navsaria PH. Time since injury is the major factor in  
39 449 preventing tranexamic acid use in the trauma setting: An observational cohort study from a major trauma  
40 450 centre in a middle-income country. *S Afr J Surg* (2015) 53:13-8. doi: 10.7196/SAJS.2250  
41  
42  
43 451 43. Sisak K, Manolis M, Hardy BM, Enninghorst N, Bendinelli C, Balogh ZsJ. Acute transfusion  
44 452 practice during trauma resuscitation: who, when, where and why? *Injury* (2013) 44:581-6. doi:  
45 453 10.1016/j.injury.2012.08.031  
46  
47  
48 454 44. Barriot P, Riou B. Hemorrhagic shock with paradoxical bradycardia. *Intensive Care Med* (1987)  
49 455 13:203-7. doi: 10.1007/BF00254705  
50  
51  
52 456 45. Hooper N, Armstrong TJ. Hemorrhagic Shock. (2020).  
53 457 <https://www.ncbi.nlm.nih.gov/books/NBK470382/> [Accessed: February 25, 2021]  
54  
55  
56  
57  
58  
59  
60

1  
2  
3 458 46. Perel P, Prieto-Merino D, Shakur H, Clayton T, Lecky F, Bouamra O, et al. Predicting early death  
4 459 in patients with traumatic bleeding: development and validation of prognostic model. *BMJ* (2012)  
5 460 345:e5166. doi:10.1136/bmj.e5166  
6  
7

8 461 47. Jávora P, Csonka E, Butt E, Rárosi F, Babik B, Török L, et al. Comparison of the previous and current  
9 462 trauma-related shock classifications – A retrospective cohort study from a level I trauma centre. *Eur*  
10 463 *Surg Res* (2021) doi: 10.1159/000516102  
11  
12  
13

## 14 15 464 **FIGURE LEGENDS**

16  
17 465 **Fig. 1.** PRISMA flow diagram. Our search strategy resulted 2017 papers. After excluding articles  
18 466 published before 2010 and duplicates, 1373 papers were screened based on title and abstract. In 79 cases  
19 467 the title clearly indicated non-eligible study design such as review or systematic review. Twenty-four  
20 468 title pointed out that the paper is a case report of a sole case. In 124 cases, the title clearly indicated non-  
21 469 eligible study population such as pregnant or pediatric. Five hundred sixteen titles revealed that the study  
22 470 is not closely related to our research topic. In 73 cases the title clearly indicated an animal experiment.  
23 471 Twenty-one records were excluded based on abstract due to a non-eligible study design such as review  
24 472 or systematic review. The abstract indicated a non-eligible study population such as pregnant or pediatric  
25 473 in 94 cases. In 110 cases, the abstract indicated that the study is not closely related to our research topic.  
26 474 Thirty-nine animal experiments were filtered out based on abstract. Eight studies did not have an English  
27 475 language abstract. In 112 cases, the abstract revealed that the study includes data that is more than 10  
28 476 years old. Forty-one case reports with a patient number <10 were excluded based on abstract.  
29 477 After excluding a total of 816 papers based on title and 425 based on abstract, 132 full-texts were  
30 478 assessed for eligibility. Reasons for non-inclusion of full-text articles are detailed above in the Figure.  
31 479 Ultimately, 19 studies were enrolled to our meta-regression  
32 480 \*heart rate (HR) was not provided in mean or median, only the number of patients in ranges of HR (e.g.,  
33 481 100-120 bpm) was given  
34  
35  
36  
37  
38  
39  
40  
41  
42  
43  
44

## 45 482 **Fig. 2.** Risk of bias assessment.

46 483 **a:** The figure shows the risk of bias in the 6 main domains of the Quality In Prognostic Studies (QUIPS)  
47 484 assessment, in each paper. ‘Study attrition’ was not suitable for the retrospective studies. In 5 prospective  
48 485 studies, there was a moderate risk for study attrition bias. All studies were judged to carry a low risk of  
49 486 bias in ‘Study participation’ and ‘Prognostic factor measurement’ domains. ‘Study confounding’ was  
50 487 the worst rated domain: a moderate risk appeared in almost half of the records, in which the role of  
51 488 important confounders was not reported thoroughly. Based on the assessment of the 6 main domains,  
52 489 the overall risk of bias was determined for each study

53  
54  
55  
56 490 **b:** The summarized risk of bias is illustrated in percentages in the main domains  
57  
58  
59  
60

1  
2  
3 491 **Fig. 3.** Relation between heart rate (HR) and mortality of bleeding trauma patients. Linear association  
4 492 between HR and mortality could not be identified.

5  
6 493 HR=heart rate  
7

8 494 **Fig. 4.** Subgroup analysis of studies on trauma patients who received blood products. Linear association  
9 495 between early heart rate (HR) and mortality rate of patients could not be identified.

10  
11 496 HR=heart rate  
12  
13  
14  
15  
16  
17  
18  
19  
20  
21  
22  
23  
24  
25  
26  
27  
28  
29  
30  
31  
32  
33  
34  
35  
36  
37  
38  
39  
40  
41  
42  
43  
44  
45  
46  
47  
48  
49  
50  
51  
52  
53  
54  
55  
56  
57  
58  
59  
60

For peer review only

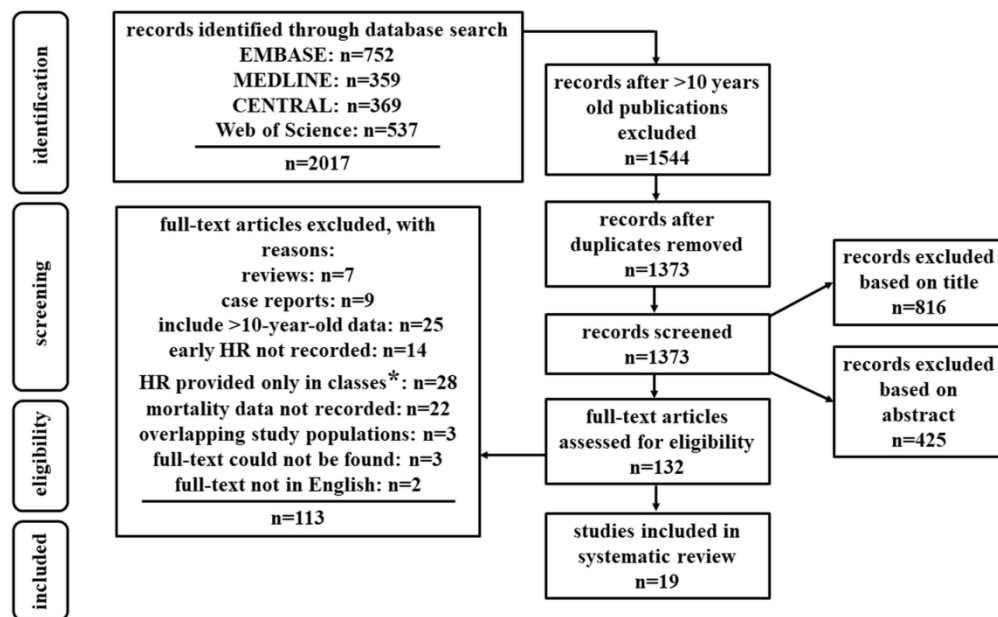

Fig. 1. PRISMA flow diagram. Our search strategy resulted 2017 papers. After excluding articles published before 2010 and duplicates, 1373 papers were screened based on title and abstract. In 79 cases the title clearly indicated non-eligible study design such as review or systematic review. Twenty-four title pointed out that the paper is a case report of a sole case. In 124 cases, the title clearly indicated non-eligible study population such as pregnant or pediatric. Five hundred sixteen titles revealed that the study is not closely related to our research topic. In 73 cases the title clearly indicated an animal experiment. Twenty-one records were excluded based on abstract due to a non-eligible study design such as review or systematic review. The abstract indicated a non-eligible study population such as pregnant or pediatric in 94 cases. In 110 cases, the abstract indicated that the study is not closely related to our research topic. Thirty-nine animal experiments were filtered out based on abstract. Eight studies did not have an English language abstract. In 112 cases, the abstract revealed that the study includes data that is more than 10 years old. Forty-one case reports with a patient number <10 were excluded based on abstract. After excluding a total of 816 papers based on title and 425 based on abstract, 132 full-texts were assessed for eligibility. Reasons for non-inclusion of full-text articles are detailed above in the Figure. Ultimately, 19 studies were enrolled to our meta-regression

\*heart rate (HR) was not provided in mean or median, only the number of patients in ranges of HR (e.g., 100-120 bpm) was given

170x105mm (300 x 300 DPI)





Fig. 2. Risk of bias assessment.

a: The figure shows the risk of bias in the 6 main domains of the Quality In Prognostic Studies (QUIPS) assessment, in each paper. 'Study attrition' was not suitable for the retrospective studies. In 5 prospective studies, there was a moderate risk for study attrition bias. All studies were judged to carry a low risk of bias in 'Study participation' and 'Prognostic factor measurement' domains. 'Study confounding' was the worst rated domain: a moderate risk appeared in almost half of the records, in which the role of important confounders was not reported thoroughly. Based on the assessment of the 6 main domains, the overall risk of bias was determined for each study

b: The summarized risk of bias is illustrated in percentages in the main domains

170x155mm (300 x 300 DPI)

1  
2  
3  
4  
5  
6  
7  
8  
9  
10  
11  
12  
13  
14  
15  
16  
17  
18  
19  
20  
21  
22  
23  
24  
25  
26  
27  
28  
29  
30  
31  
32  
33  
34  
35  
36  
37  
38  
39  
40  
41  
42  
43  
44  
45  
46  
47  
48  
49  
50  
51  
52  
53  
54  
55  
56  
57  
58  
59  
60

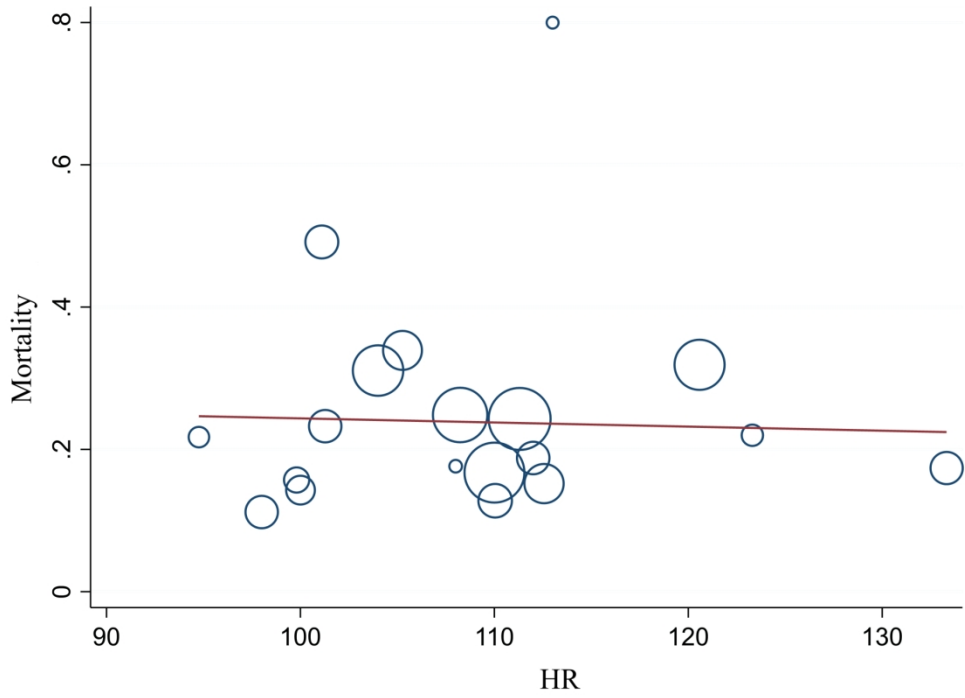

Fig. 3. Relation between heart rate (HR) and mortality of bleeding trauma patients. Linear association between HR and mortality could not be identified.  
HR=heart rate

170x123mm (300 x 300 DPI)



Fig. 4. Subgroup analysis of studies on trauma patients who received blood products. Linear association between early heart rate (HR) and mortality rate of patients could not be identified.  
HR=heart rate

170x123mm (300 x 300 DPI)

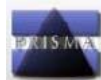

## PRISMA 2020 Checklist

| Section and Topic             | Item # | Checklist item                                                                                                                                                                                                                                                                                       | Location where item is reported (Page nr.) |
|-------------------------------|--------|------------------------------------------------------------------------------------------------------------------------------------------------------------------------------------------------------------------------------------------------------------------------------------------------------|--------------------------------------------|
| <b>TITLE</b>                  |        |                                                                                                                                                                                                                                                                                                      |                                            |
| Title                         | 1      | Identify the report as a systematic review.                                                                                                                                                                                                                                                          | 1                                          |
| <b>ABSTRACT</b>               |        |                                                                                                                                                                                                                                                                                                      |                                            |
| Abstract                      | 2      | See the PRISMA 2020 for Abstracts checklist.                                                                                                                                                                                                                                                         | 2                                          |
| <b>INTRODUCTION</b>           |        |                                                                                                                                                                                                                                                                                                      |                                            |
| Rationale                     | 3      | Describe the rationale for the review in the context of existing knowledge.                                                                                                                                                                                                                          | 2-3                                        |
| Objectives                    | 4      | Provide an explicit statement of the objective(s) or question(s) the review addresses.                                                                                                                                                                                                               | 3                                          |
| <b>METHODS</b>                |        |                                                                                                                                                                                                                                                                                                      |                                            |
| Eligibility criteria          | 5      | Specify the inclusion and exclusion criteria for the review and how studies were grouped for the syntheses.                                                                                                                                                                                          | 4                                          |
| Information sources           | 6      | Specify all databases, registers, websites, organisations, reference lists and other sources searched or consulted to identify studies. Specify the date when each source was last searched or consulted.                                                                                            | 4                                          |
| Search strategy               | 7      | Present the full search strategies for all databases, registers and websites, including any filters and limits used.                                                                                                                                                                                 | 4                                          |
| Selection process             | 8      | Specify the methods used to decide whether a study met the inclusion criteria of the review, including how many reviewers screened each record and each report retrieved, whether they worked independently, and if applicable, details of automation tools used in the process.                     | 4-5                                        |
| Data collection process       | 9      | Specify the methods used to collect data from reports, including how many reviewers collected data from each report, whether they worked independently, any processes for obtaining or confirming data from study investigators, and if applicable, details of automation tools used in the process. | 4, 10                                      |
| Data items                    | 10a    | List and define all outcomes for which data were sought. Specify whether all results that were compatible with each outcome domain in each study were sought (e.g. for all measures, time points, analyses), and if not, the methods used to decide which results to collect.                        | 5                                          |
|                               | 10b    | List and define all other variables for which data were sought (e.g. participant and intervention characteristics, funding sources). Describe any assumptions made about any missing or unclear information.                                                                                         | 4                                          |
| Study risk of bias assessment | 11     | Specify the methods used to assess risk of bias in the included studies, including details of the tool(s) used, how many reviewers assessed each study and whether they worked independently, and if applicable, details of automation tools used in the process.                                    | 5                                          |
| Effect measures               | 12     | Specify for each outcome the effect measure(s) (e.g. risk ratio, mean difference) used in the synthesis or presentation of results.                                                                                                                                                                  | 5                                          |
| Synthesis methods             | 13a    | Describe the processes used to decide which studies were eligible for each synthesis (e.g. tabulating the study intervention characteristics and comparing against the planned groups for each synthesis (item #5)).                                                                                 | -                                          |
|                               | 13b    | Describe any methods required to prepare the data for presentation or synthesis, such as handling of missing summary statistics, or data conversions.                                                                                                                                                | -                                          |
|                               | 13c    | Describe any methods used to tabulate or visually display results of individual studies and syntheses.                                                                                                                                                                                               | -                                          |
|                               | 13d    | Describe any methods used to synthesize results and provide a rationale for the choice(s). If meta-analysis was performed, describe the model(s), method(s) to identify the presence and extent of statistical heterogeneity, and software package(s) used.                                          | -                                          |
|                               | 13e    | Describe any methods used to explore possible causes of heterogeneity among study results (e.g. subgroup analysis, meta-regression).                                                                                                                                                                 | -                                          |
|                               | 13f    | Describe any sensitivity analyses conducted to assess robustness of the synthesized results.                                                                                                                                                                                                         | -                                          |
| Reporting bias assessment     | 14     | Describe any methods used to assess risk of bias due to missing results in a synthesis (arising from reporting biases).                                                                                                                                                                              | 5                                          |
| Certainty                     | 15     | Describe any methods used to assess certainty (or confidence) in the body of evidence for an outcome.                                                                                                                                                                                                | -                                          |

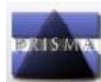

## PRISMA 2020 Checklist

1  
2  
3  
4  
5  
6  
7  
8  
9  
10  
11  
12  
13  
14  
15  
16  
17  
18  
19  
20  
21  
22  
23  
24  
25  
26  
27  
28  
29  
30  
31  
32  
33  
34  
35  
36  
37  
38  
39  
40  
41  
42  
43  
44  
45  
46  
47

| Section and Topic                              | Item # | Checklist item                                                                                                                                                                                                                                                                       | Location where item is reported (Page nr.) |
|------------------------------------------------|--------|--------------------------------------------------------------------------------------------------------------------------------------------------------------------------------------------------------------------------------------------------------------------------------------|--------------------------------------------|
| assessment                                     |        |                                                                                                                                                                                                                                                                                      |                                            |
| <b>RESULTS</b>                                 |        |                                                                                                                                                                                                                                                                                      |                                            |
| Study selection                                | 16a    | Describe the results of the search and selection process, from the number of records identified in the search to the number of studies included in the review, ideally using a flow diagram.                                                                                         | 5, Fig. 1                                  |
|                                                | 16b    | Cite studies that might appear to meet the inclusion criteria, but which were excluded, and explain why they were excluded.                                                                                                                                                          | -                                          |
| Study characteristics                          | 17     | Cite each included study and present its characteristics.                                                                                                                                                                                                                            | 6 (Table 1)                                |
| Risk of bias in studies                        | 18     | Present assessments of risk of bias for each included study.                                                                                                                                                                                                                         | 6-7 (Fig. 2)                               |
| Results of individual studies                  | 19     | For all outcomes, present, for each study: (a) summary statistics for each group (where appropriate) and (b) an effect estimate and its precision (e.g. confidence/credible interval), ideally using structured tables or plots.                                                     | 7 (Fig 3-4)                                |
| Results of syntheses                           | 20a    | For each synthesis, briefly summarise the characteristics and risk of bias among contributing studies.                                                                                                                                                                               | -                                          |
|                                                | 20b    | Present results of all statistical syntheses conducted. If meta-analysis was done, present for each the summary estimate and its precision (e.g. confidence/credible interval) and measures of statistical heterogeneity. If comparing groups, describe the direction of the effect. | -                                          |
|                                                | 20c    | Present results of all investigations of possible causes of heterogeneity among study results.                                                                                                                                                                                       | -                                          |
|                                                | 20d    | Present results of all sensitivity analyses conducted to assess the robustness of the synthesized results.                                                                                                                                                                           | -                                          |
| Reporting biases                               | 21     | Present assessments of risk of bias due to missing results (arising from reporting biases) for each synthesis assessed.                                                                                                                                                              | 6-7, (Fig. 2)                              |
| Certainty of evidence                          | 22     | Present assessments of certainty (or confidence) in the body of evidence for each outcome assessed.                                                                                                                                                                                  | -                                          |
| <b>DISCUSSION</b>                              |        |                                                                                                                                                                                                                                                                                      |                                            |
| Discussion                                     | 23a    | Provide a general interpretation of the results in the context of other evidence.                                                                                                                                                                                                    | 7-8                                        |
|                                                | 23b    | Discuss any limitations of the evidence included in the review.                                                                                                                                                                                                                      | 9                                          |
|                                                | 23c    | Discuss any limitations of the review processes used.                                                                                                                                                                                                                                | 9                                          |
|                                                | 23d    | Discuss implications of the results for practice, policy, and future research.                                                                                                                                                                                                       | 9                                          |
| <b>OTHER INFORMATION</b>                       |        |                                                                                                                                                                                                                                                                                      |                                            |
| Registration and protocol                      | 24a    | Provide registration information for the review, including register name and registration number, or state that the review was not registered.                                                                                                                                       | 4                                          |
|                                                | 24b    | Indicate where the review protocol can be accessed, or state that a protocol was not prepared.                                                                                                                                                                                       | 4                                          |
|                                                | 24c    | Describe and explain any amendments to information provided at registration or in the protocol.                                                                                                                                                                                      | -                                          |
| Support                                        | 25     | Describe sources of financial or non-financial support for the review, and the role of the funders or sponsors in the review.                                                                                                                                                        | 9                                          |
| Competing interests                            | 26     | Declare any competing interests of review authors.                                                                                                                                                                                                                                   | 9                                          |
| Availability of data, code and other materials | 27     | Report which of the following are publicly available and where they can be found: template data collection forms; data extracted from included studies; data used for all analyses; analytic code; any other materials used in the review.                                           | 10                                         |

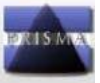

# PRISMA 2020 Checklist

1  
2  
3  
4  
5  
6  
7  
8  
9  
10  
11  
12  
13  
14  
15  
16  
17  
18  
19  
20  
21  
22  
23  
24  
25  
26  
27  
28  
29  
30  
31  
32  
33  
34  
35  
36  
37  
38  
39  
40  
41  
42  
43  
44  
45  
46  
47

From: Page MJ, McKenzie JE, Bossuyt PM, Boutron I, Hoffmann TC, Mulrow CD, et al. The PRISMA 2020 statement: an updated guideline for reporting systematic reviews. *BMJ* 2021;372:n71. doi: 10.1136/bmj.n71

For more information, visit: <http://www.prisma-statement.org/>

For peer review only

| Study: first author, year of publication | Data origin: institute, country                                    | Data collection: type, date                               | Indicators of hemorrhage                                                                                  | Patient number (n) | Age (y) mean $\pm$ SD or median [IQR] | Male gender n (%) | HR mean $\pm$ SD (PH/AD) | Mortality n, (%) | Main outcome(s)                                                                                                            |
|------------------------------------------|--------------------------------------------------------------------|-----------------------------------------------------------|-----------------------------------------------------------------------------------------------------------|--------------------|---------------------------------------|-------------------|--------------------------|------------------|----------------------------------------------------------------------------------------------------------------------------|
| Bohonek 2019                             | Military University Hospital Prague, Czech Republic                | retrospective, single-center, 2014-2018                   | received blood products (fresh apheresis platelets or cryopreserved platelets)                            | 46                 | 53 [20–80]; 50 [27–66]*               | 32 (69.6%)        | 94.8 $\pm$ 59.0 (AD)     | 10 (21.7%)       | mortality, blood products administered, adverse effects following platelet transfusion, laboratory parameters such as aPTT |
| Boudreau 2019                            | University of Cincinnati Medical Center, Cincinnati, Ohio, USA     | retrospective, single-center, April 2014 – October 2015   | received blood products and tranexamic acid                                                               | 116                | 45 [24–61]; 33 [23–45]*               | 90 (77.6%)        | 101.3 $\pm$ 43.0 (PH)    | 27 (23.3%)       | mortality, thrombotic events, transfusion requirements                                                                     |
| Duchesne 2019                            | 11 level I trauma centers, 1 level II trauma center from the USA   | retrospective, multi-center, January 2011 – December 2016 | pelvic fracture with SBP $\leq$ 90 mmHg and/or HR $\geq$ 120 bpm and/or BD $\geq$ 5 mEq                   | 279                | 40 [28–54]                            | 172 (62.0%)       | 120.6 $\pm$ 27.7 (AD)    | 89 (32.0%)       | mortality, frequency of each hemorrhage intervention adjunct used, time to definitive bleeding control                     |
| Montazer 2019                            | Imam Khomeini Hospital, Sari, Iran                                 | prospective, single-center, March 2014 – February 2015    | multiple trauma with hemodynamic instability (not defined)                                                | 400                | 42 $\pm$ 20                           | 333 (83.3%)       | 110.0 $\pm$ 14.0 (AD)    | 67 (16.7%)       | mortality                                                                                                                  |
| Priestley 2019                           | LAC+USC Medical Center, LAC+USC blood bank database, University of | retrospective, single-center, January 2010 – October 2014 | received 3 units of pRBC in any 60-minute period within 24 hours of admission and received interventional | 283                | 34 [24–48]                            | 244 (86.2%)       | 104.0 $\pm$ 24.0 (PH)    | 88 (31.1%)       | mortality, days on ventilator, length of hospitalization                                                                   |

|                          |                                                             |                                                                   |                                                                                                                                                                                                                                                                                                                      |            |                         |                   |                          |                   |                                                |
|--------------------------|-------------------------------------------------------------|-------------------------------------------------------------------|----------------------------------------------------------------------------------------------------------------------------------------------------------------------------------------------------------------------------------------------------------------------------------------------------------------------|------------|-------------------------|-------------------|--------------------------|-------------------|------------------------------------------------|
|                          | <i>Southern California, Los Angeles, CA, USA</i>            |                                                                   | <i>radiology or surgery for definitive hemorrhage control</i>                                                                                                                                                                                                                                                        |            |                         |                   |                          |                   |                                                |
| <i>Barmparas 2018</i>    | <i>Cedars-Sinai Medical Center Los Angeles, CA, USA</i>     | <i>retrospective, single-center January 2011 – October 2016</i>   | <i>received massive transfusion (defined as 3 units of pRBC within the first hour from admission)</i>                                                                                                                                                                                                                | <i>120</i> | <i>39.0 [27.0-54.8]</i> | <i>92 (76.7)</i>  | <i>101.1 ± 39.7 (AD)</i> | <i>59 (49.2)</i>  | <i>mortality</i>                               |
| <i>Chaochan kit 2018</i> | <i>Songklanagari nd Hospital, Hat Yai, Thailand</i>         | <i>retrospective, single-center, January 2014 – December 2014</i> | <i>received massive transfusion, met trauma team activation criteria</i>                                                                                                                                                                                                                                             | <i>15</i>  | <i>35 [22-44.5]</i>     | <i>13 (86.7)</i>  | <i>113.0 ± 22.1 (AD)</i> | <i>12 (80.0)</i>  | <i>need for massive transfusion</i>            |
| <i>Moore 2018</i>        | <i>Denver Health Medical Center, Denver, CO, USA</i>        | <i>prospective, single-center, April 2014 – March 2017</i>        | <i>SBP ≤ 70 mmHg or 71-90 mmHg with HR ≥ 108 bpm</i>                                                                                                                                                                                                                                                                 | <i>125</i> | <i>33 [25-47]</i>       | <i>103 (82.4)</i> | <i>110.0 ± 15.9 (PH)</i> | <i>16 (12.8)</i>  | <i>mortality</i>                               |
| <i>Ng 2018</i>           | <i>British Columbia Trauma Registry, Canada</i>             | <i>retrospective, single-center, April 2012 – June 2015</i>       | <i>SBP ≤ 90 mmHg and/or HR ≥ 110 bpm</i>                                                                                                                                                                                                                                                                             | <i>117</i> | <i>43 ± 19</i>          | <i>96 (82.0)</i>  | <i>112.0 ± 35.0 (AD)</i> | <i>22 (19.0)</i>  | <i>meeting the indication criteria for TXA</i> |
| <i>Guo 2017</i>          | <i>33 academic hospitals in 16 Chinese provinces, China</i> | <i>prospective, multi-center, December 2013 – April 2014</i>      | <i>new-onset hypotension unexplained by any other cause than hemorrhage (SBP &lt; 90 mmHg, DBP &lt; 60 mmHg, or MAP &lt; 65 mmHg or decreased SBP with more than 40 mmHg from baseline in a hypertensive patient), and signs of tissue hypoperfusion (tachycardia, oliguria, mottled skin, altered mental state)</i> | <i>428</i> | <i>52 ± 18</i>          | <i>296 (69.2)</i> | <i>111.3 ± 17.9 (AD)</i> | <i>104 (23.4)</i> | <i>mortality</i>                               |
| <i>Heidari 2017</i>      | <i>4 level I trauma centers from Iran</i>                   | <i>prospective, multi-center, April 2015 – September 2015</i>     | <i>blunt abdominal trauma with positive FAST</i>                                                                                                                                                                                                                                                                     | <i>168</i> | <i>38 ± 17</i>          | <i>129 (76.8)</i> | <i>105.3 ± 23.4 (AD)</i> | <i>57 (33.9)</i>  | <i>positive FAST, mortality</i>                |



|                 |                                                                                                                                                                   |                                                                             |                                                                                                                                                                                        |     |                |                   |                         |                  |                                                                                                                                                                                                    |
|-----------------|-------------------------------------------------------------------------------------------------------------------------------------------------------------------|-----------------------------------------------------------------------------|----------------------------------------------------------------------------------------------------------------------------------------------------------------------------------------|-----|----------------|-------------------|-------------------------|------------------|----------------------------------------------------------------------------------------------------------------------------------------------------------------------------------------------------|
| Luehr<br>2017   | Mercy<br>Hospital-<br>Springfield,<br>Springfield,<br>MO, USA                                                                                                     | retrospective<br>, single-<br>center,<br>2013 - 2016                        | received blood<br>products and<br>tranexamic acid                                                                                                                                      | 115 | 42 ± 18        | 78<br>(67.8<br>)  | 133.3<br>± 21.4<br>(PH) | 20<br>(17.<br>4) | mortality                                                                                                                                                                                          |
| Naumann<br>2017 | University<br>Hospitals<br>Birmingham<br>NHS<br>Foundation<br>Trust,<br>Birmingham,<br>UK                                                                         | retrospective<br>, single-<br>center,<br>July 2015 –<br>January<br>2017     | received blood<br>products,<br>required<br>intensive care<br>and had a lactate<br>value >2 mmol/l<br>(cohort B**)                                                                      | 17  | 40 ± 18        | 16<br>(94.0<br>)  | 108.0<br>± 16.2<br>(AD) | 3<br>(17.<br>6)  | mortality,<br>thromboe<br>mbolic<br>events,<br>hospital-<br>free and<br>ICU-free<br>days<br>(calculate<br>d as 30<br>minus the<br>number of<br>days in<br>hospital<br>and ICU<br>respective<br>ly) |
| Savage<br>2017  | Indiana<br>University<br>School of<br>Medicine,<br>Indianapolis<br>IN, USA; The<br>University of<br>Tennessee<br>Health Science<br>Center,<br>Memphis, TN,<br>USA | retrospective<br>, multi-<br>center,<br>September<br>2013 – May<br>2015     | received at least<br>one unit of pRBC<br>within the first 24<br>hours of<br>admission                                                                                                  | 330 | 35 [25-<br>54] | 251<br>(76.0<br>) | 108.2<br>± 55.3<br>(AD) | 82<br>(24.<br>8) | mortality                                                                                                                                                                                          |
| Day<br>2016     | The Queen's<br>Medical<br>Center,<br>Honolulu,<br>Hawaii, USA                                                                                                     | retrospective<br>, single-<br>center,<br>September<br>2011 –<br>March 2013  | received at least<br>one unit of pRBC<br>in the first 6<br>hours, met<br>trauma team<br>activation<br>criteria                                                                         | 116 | no data        | no<br>data        | 98.0 ±<br>24.0<br>(PH)  | 13<br>(11.<br>0) | multiple<br>transfusio<br>ns                                                                                                                                                                       |
| Ordoñez<br>2016 | Fundación<br>Valle del Lili,<br>University<br>Hospital, Cali,<br>Colombia                                                                                         | retrospective<br>, single-<br>center,<br>January 2012<br>– December<br>2013 | ISS > 15 with<br>hemodynamic<br>instability (SBP<br>< 100 mmHg<br>and/or HR > 100<br>bpm and/or the<br>need for at least 4<br>units of packed<br>red blood cells in<br>the trauma bay) | 171 | 32 ± 14        | 154<br>(90.0<br>) | 112.6<br>± 23.5<br>(AD) | 26<br>(15.<br>2) | mortality                                                                                                                                                                                          |
| Shah<br>2015    | Aga Khan<br>University<br>Hospital,<br>Karachi,<br>Pakistan                                                                                                       | retrospective<br>, single-<br>center,<br>January 2011<br>– December<br>2012 | isolated<br>abdominal<br>gunshot wound                                                                                                                                                 | 70  | 35 ± 11        | 68<br>(97.1<br>)  | 99.8 ±<br>30.3<br>(AD)  | 11<br>(15.<br>7) | mortality,<br>complicat<br>ions                                                                                                                                                                    |

|                  |                                                                                                                                        |                                                                               |                                                                                                    |    |                |                  |                         |                  |                                                                                                                  |
|------------------|----------------------------------------------------------------------------------------------------------------------------------------|-------------------------------------------------------------------------------|----------------------------------------------------------------------------------------------------|----|----------------|------------------|-------------------------|------------------|------------------------------------------------------------------------------------------------------------------|
| Thurston<br>2015 | Trauma<br>Center, Groote<br>Schoor<br>Hospital and<br>Faculty of<br>Health<br>Sciences,<br>University of<br>Cape Town,<br>South Africa | prospective,<br>single-<br>center,<br>September<br>2013 –<br>November<br>2013 | SBP < 90 mmHg<br>and/or HR >110<br>bpm at any time<br>from admission<br>to 3 hours after<br>injury | 50 | 32 ± 13        | 47<br>(94.0<br>) | 123.3<br>± 13.1<br>(AD) | 11<br>(22.<br>0) | mortality                                                                                                        |
| Sisak<br>2013    | John Hunter<br>Hospital and<br>University of<br>Newcastle,<br>Newcastle,<br>NSW, Australia                                             | prospective,<br>single-<br>center,<br>January<br>2010 –<br>January<br>2011    | received blood<br>products within<br>the first 24 hours<br>from admission                          | 91 | 38 [22–<br>59] | 68<br>(74.7<br>) | 100.0<br>± 30.1<br>(AD) | 13<br>(14.<br>0) | mortality,<br>need for<br>emergent<br>surgery,<br>ICU<br>admission<br>, length of<br>ICU-and<br>hospital<br>stay |

**Table S2.** Detailed description of the characteristics of the included studies. Most papers enrolled trauma patients receiving blood products and/or showing signs of hemodynamic instability. Hemodynamic instability was defined by vital parameters in most cases. Most of the data was collected retrospectively. The number of participants in each dataset ranged from 15 to 428. There is a significant heterogeneity in mortality between datasets. The need for massive transfusion is accompanied by a prominently high mortality rate. A mean heart rate (HR) > 120 bpm does not entail an outstanding mortality rate.

\*the study population was divided into two groups, median [IQR] age values were provided separately for the groups

\*\*only cohort B consisted of trauma patients with active bleeding

SD=standard deviation, IQR=interquartile range, aPTI=activated partial thromboplastin time, ICU=intensive care unit, PH=prehospital, AD=upon admission, pRBC=packed red blood cells, RCT=randomized controlled trial, SBP=systolic blood pressure, DBP=diastolic blood pressure, MAP=mean arterial pressure, ISS=injury severity score, HR=heart rate, bpm=beats per minute, BD=base deficit, FAST=focused assessment with sonography for trauma, TXA=tranexamic acid
