# Supplementary material for: Predictive value of tachycardia for mortality in trauma-related haemorrhagic shock: a systematic review and meta-regression
Source: PubMed Central journal article supplement — BMJ Open. 2022 Oct 19;12(10):e059271. doi: 10.1136/bmjopen-2021-059271 (PMC9582324; doi:10.1136/bmjopen-2021-059271), 2022-10-19
Supplement: bmjopen-2021-059271supp002.pdf [file bmjopen-2021-059271supp002.pdf]

| Study: first author, year of publication | Data origin: institute, country                                    | Data collection: type, date                               | Indicators of hemorrhage                                                                                  | Patient number (n) | Age (y) mean $\pm$ SD or median [IQR] | Male gender n (%) | HR mean $\pm$ SD (PH/AD) | Mortality n, (%) | Main outcome(s)                                                                                                            |
|------------------------------------------|--------------------------------------------------------------------|-----------------------------------------------------------|-----------------------------------------------------------------------------------------------------------|--------------------|---------------------------------------|-------------------|--------------------------|------------------|----------------------------------------------------------------------------------------------------------------------------|
| Bohonek 2019                             | Military University Hospital Prague, Czech Republic                | retrospective, single-center, 2014-2018                   | received blood products (fresh apheresis platelets or cryopreserved platelets)                            | 46                 | 53 [20–80]; 50 [27–66]*               | 32 (69.6)         | 94.8 $\pm$ 59.0 (AD)     | 10 (21.7)        | mortality, blood products administered, adverse effects following platelet transfusion, laboratory parameters such as aPTT |
| Boudreau 2019                            | University of Cincinnati Medical Center, Cincinnati, Ohio, USA     | retrospective, single-center, April 2014 – October 2015   | received blood products and tranexamic acid                                                               | 116                | 45 [24–61]; 33 [23–45]*               | 90 (77.6)         | 101.3 $\pm$ 43.0 (PH)    | 27 (23.3)        | mortality, thrombotic events, transfusion requirements                                                                     |
| Duchesne 2019                            | 11 level I trauma centers, 1 level II trauma center from the USA   | retrospective, multi-center, January 2011 – December 2016 | pelvic fracture with SBP $\leq$ 90 mmHg and/or HR $\geq$ 120 bpm and/or BD $\geq$ 5 mEq                   | 279                | 40 [28–54]                            | 172 (62.0)        | 120.6 $\pm$ 27.7 (AD)    | 89 (32.0)        | mortality, frequency of each hemorrhage intervention adjunct used, time to definitive bleeding control                     |
| Montazer 2019                            | Imam Khomeini Hospital, Sari, Iran                                 | prospective, single-center, March 2014 – February 2015    | multiple trauma with hemodynamic instability (not defined)                                                | 400                | 42 $\pm$ 20                           | 333 (83.3)        | 110.0 $\pm$ 14.0 (AD)    | 67 (16.7)        | mortality                                                                                                                  |
| Priestley 2019                           | LAC+USC Medical Center, LAC+USC blood bank database, University of | retrospective, single-center, January 2010 – October 2014 | received 3 units of pRBC in any 60-minute period within 24 hours of admission and received interventional | 283                | 34 [24–48]                            | 244 (86.2)        | 104.0 $\pm$ 24.0 (PH)    | 88 (31.1)        | mortality, days on ventilator, length of hospitalization                                                                   |

|                          |                                                         |                                                                   |                                                                                                                                                                                                                                                                                                      |     |                  |            |                   |            |                                         |
|--------------------------|---------------------------------------------------------|-------------------------------------------------------------------|------------------------------------------------------------------------------------------------------------------------------------------------------------------------------------------------------------------------------------------------------------------------------------------------------|-----|------------------|------------|-------------------|------------|-----------------------------------------|
|                          | <i>Southern California, Los Angeles, CA, USA</i>        |                                                                   | <i>radiology or surgery for definitive hemorrhage control</i>                                                                                                                                                                                                                                        |     |                  |            |                   |            |                                         |
| <i>Barmparas 2018</i>    | <i>Cedars-Sinai Medical Center Los Angeles, CA, USA</i> | <i>retrospective, single-center January 2011 – October 2016</i>   | <i>received massive transfusion (defined as 3 units of pRBC within the first hour from admission)</i>                                                                                                                                                                                                | 120 | 39.0 [27.0-54.8] | 92 (76.7)  | 101.1 ± 39.7 (AD) | 59 (49.2)  | mortality                               |
| <i>Chaochan kit 2018</i> | <i>Songklanagarind Hospital, Hat Yai, Thailand</i>      | <i>retrospective, single-center, January 2014 – December 2014</i> | <i>received massive transfusion, met trauma team activation criteria</i>                                                                                                                                                                                                                             | 15  | 35 [22-44.5]     | 13 (86.7)  | 113.0 ± 22.1 (AD) | 12 (80.0)  | <i>need for massive transfusion</i>     |
| Moore 2018               | Denver Health Medical Center, Denver, CO, USA           | prospective, single-center, April 2014 – March 2017               | SBP ≤ 70 mmHg or 71-90 mmHg with HR ≥ 108 bpm                                                                                                                                                                                                                                                        | 125 | 33 [25-47]       | 103 (82.4) | 110.0 ± 15.9 (PH) | 16 (12.8)  | mortality                               |
| Ng 2018                  | British Columbia Trauma Registry, Canada                | retrospective, single-center, April 2012 – June 2015              | SBP ≤ 90 mmHg and/or HR ≥ 110 bpm                                                                                                                                                                                                                                                                    | 117 | 43 ± 19          | 96 (82.0)  | 112.0 ± 35.0 (AD) | 22 (19.0)  | meeting the indication criteria for TXA |
| Guo 2017                 | 33 academic hospitals in 16 Chinese provinces, China    | prospective, multi-center, December 2013 – April 2014             | new-onset hypotension unexplained by any other cause than hemorrhage (SBP < 90 mmHg, DBP < 60 mmHg, or MAP < 65 mmHg or decreased SBP with more than 40 mmHg from baseline in a hypertensive patient), and signs of tissue hypoperfusion (tachycardia, oliguria, mottled skin, altered mental state) | 428 | 52 ± 18          | 296 (69.2) | 111.3 ± 17.9 (AD) | 104 (23.4) | mortality                               |
| Heidari 2017             | 4 level I trauma centers from Iran                      | prospective, multi-center, April 2015 – September 2015            | blunt abdominal trauma with positive FAST                                                                                                                                                                                                                                                            | 168 | 38 ± 17          | 129 (76.8) | 105.3 ± 23.4 (AD) | 57 (33.9)  | positive FAST, mortality                |

|              |                                                                                                                                  |                                                            |                                                                                                                                                             |     |            |            |                   |           |                                                                                                                                                |
|--------------|----------------------------------------------------------------------------------------------------------------------------------|------------------------------------------------------------|-------------------------------------------------------------------------------------------------------------------------------------------------------------|-----|------------|------------|-------------------|-----------|------------------------------------------------------------------------------------------------------------------------------------------------|
| Luehr 2017   | Mercy Hospital-Springfield, Springfield, MO, USA                                                                                 | retrospective, single-center, 2013 - 2016                  | received blood products and tranexamic acid                                                                                                                 | 115 | 42 ± 18    | 78 (67.8)  | 133.3 ± 21.4 (PH) | 20 (17.4) | mortality                                                                                                                                      |
| Naumann 2017 | University Hospitals Birmingham NHS Foundation Trust, Birmingham, UK                                                             | retrospective, single-center, July 2015 – January 2017     | received blood products, required intensive care and had a lactate value >2 mmol/l (cohort B**)                                                             | 17  | 40 ± 18    | 16 (94.0)  | 108.0 ± 16.2 (AD) | 3 (17.6)  | mortality, thromboembolic events, hospital-free and ICU-free days (calculated as 30 minus the number of days in hospital and ICU respectively) |
| Savage 2017  | Indiana University School of Medicine, Indianapolis IN, USA; The University of Tennessee Health Science Center, Memphis, TN, USA | retrospective, multi-center, September 2013 – May 2015     | received at least one unit of pRBC within the first 24 hours of admission                                                                                   | 330 | 35 [25-54] | 251 (76.0) | 108.2 ± 55.3 (AD) | 82 (24.8) | mortality                                                                                                                                      |
| Day 2016     | The Queen's Medical Center, Honolulu, Hawaii, USA                                                                                | retrospective, single-center, September 2011 – March 2013  | received at least one unit of pRBC in the first 6 hours, met trauma team activation criteria                                                                | 116 | no data    | no data    | 98.0 ± 24.0 (PH)  | 13 (11.0) | multiple transfusions                                                                                                                          |
| Ordoñez 2016 | Fundación Valle del Lili, University Hospital, Cali, Colombia                                                                    | retrospective, single-center, January 2012 – December 2013 | ISS > 15 with hemodynamic instability (SBP < 100 mmHg and/or HR > 100 bpm and/or the need for at least 4 units of packed red blood cells in the trauma bay) | 171 | 32 ± 14    | 154 (90.0) | 112.6 ± 23.5 (AD) | 26 (15.2) | mortality                                                                                                                                      |
| Shah 2015    | Aga Khan University Hospital, Karachi, Pakistan                                                                                  | retrospective, single-center, January 2011 – December 2012 | isolated abdominal gunshot wound                                                                                                                            | 70  | 35 ± 11    | 68 (97.1)  | 99.8 ± 30.3 (AD)  | 11 (15.7) | mortality, complications                                                                                                                       |

|               |                                                                                                             |                                                            |                                                                                     |    |            |           |                   |           |                                                                                      |
|---------------|-------------------------------------------------------------------------------------------------------------|------------------------------------------------------------|-------------------------------------------------------------------------------------|----|------------|-----------|-------------------|-----------|--------------------------------------------------------------------------------------|
| Thurston 2015 | Trauma Center, Groote Schuur Hospital and Faculty of Health Sciences, University of Cape Town, South Africa | prospective, single-center, September 2013 – November 2013 | SBP < 90 mmHg and/or HR >110 bpm at any time from admission to 3 hours after injury | 50 | 32 ± 13    | 47 (94.0) | 123.3 ± 13.1 (AD) | 11 (22.0) | mortality                                                                            |
| Sisak 2013    | John Hunter Hospital and University of Newcastle, Newcastle, NSW, Australia                                 | prospective, single-center, January 2010 – January 2011    | received blood products within the first 24 hours from admission                    | 91 | 38 [22–59] | 68 (74.7) | 100.0 ± 30.1 (AD) | 13 (14.0) | mortality, need for emergent surgery, ICU admission, length of ICU-and hospital stay |

**Table S2.** Detailed description of the characteristics of the included studies. Most papers enrolled trauma patients receiving blood products and/or showing signs of hemodynamic instability. Hemodynamic instability was defined by vital parameters in most cases. Most of the data was collected retrospectively. The number of participants in each dataset ranged from 15 to 428. There is a significant heterogeneity in mortality between datasets. The need for massive transfusion is accompanied by a prominently high mortality rate. A mean heart rate (HR) > 120 bpm does not entail an outstanding mortality rate.

\*the study population was divided into two groups, median [IQR] age values were provided separately for the groups

\*\*only cohort B consisted of trauma patients with active bleeding

SD=standard deviation, IQR=interquartile range, aPTI=activated partial thromboplastin time, ICU=intensive care unit, PH=prehospital, AD=upon admission, pRBC=packed red blood cells, RCT=randomized controlled trial, SBP=systolic blood pressure, DBP=diastolic blood pressure, MAP=mean arterial pressure, ISS=injury severity score, HR=heart rate, bpm=beats per minute, BD=base deficit, FAST=focused assessment with sonography for trauma, TXA=tranexamic acid
